1

2

3 **Transmigration of *Trypanosoma cruzi* trypomastigotes through 3D**  
4 **cultures resembling a physiological environment**

5

6 Matías Exequiel Rodríguez<sup>1</sup>, Mariana Rizzi<sup>1</sup>, Lucas D. Caeiro<sup>1</sup>, Yamil E.  
7 Masip<sup>1</sup>, Alina Perrone<sup>2</sup>, Daniel O. Sánchez<sup>1</sup>, Jacqueline Búa<sup>2</sup>, Valeria  
8 Tekiel<sup>1\*</sup>

9

10 <sup>1</sup>Instituto de Investigaciones Biotecnológicas “Dr. R. Ugalde” (IIBIO)  
11 Universidad Nacional de San Martín (UNSAM) - CONICET, San Martín,  
12 Provincia de Buenos Aires, Argentina.

13 <sup>2</sup>Instituto Nacional de Parasitología ‘Dr Mario Fatała Chabén’, ANLIS CG  
14 Malbrán. Buenos Aires, Argentina.

15

16 \* Corresponding author

17 E-mail: valet@iib.unsam.edu.ar; vtekiel@gmail.com

18

19

## 20 **Abstract**

21 Chagas' disease, caused by the kinetoplastid parasite *Trypanosoma cruzi*,  
22 presents a variety of chronic clinical manifestations whose determinants are still  
23 unknown but probably influenced by the host-parasite interplay established  
24 during the first stages of the infection, when bloodstream circulating  
25 trypomastigotes disseminate to different organs and tissues. After leaving the  
26 blood, trypomastigotes must migrate through tissues to invade cells and  
27 establish a chronic infection. How this process occurs remains unexplored.  
28 Three-dimensional (3D) cultures are physiologically relevant because mimic the  
29 microarchitecture of tissues and provide an environment similar to the  
30 encountered in natural infections. In this work, we combined the 3D culture  
31 technology with host-pathogen interaction, by studying transmigration of  
32 trypomastigotes into 3D spheroids. *T. cruzi* strains with similar infection  
33 dynamics in 2D monolayer cultures but with different *in vivo* behavior (CL  
34 Brener, virulent; SylvioX10 no virulent) presented different infection rates in  
35 spheroids (CL Brener ~40%, SylvioX10 <10%). Confocal microscopy images  
36 evidenced that trypomastigotes from CL Brener and other highly virulent strains  
37 presented a great ability to transmigrate inside 3D spheroids: as soon as 4 hours  
38 post infection parasites were found at 50  $\mu\text{m}$  in depth inside the spheroids. CL  
39 Brener trypomastigotes were evenly distributed and systematically observed in  
40 the space between cells, suggesting a paracellular route of transmigration to  
41 deepen into the spheroids. On the other hand, poor virulent strains presented a  
42 weak migratory capacity and remained in the external layers of spheroids  
43 (<10 $\mu\text{m}$ ) with a patch-like distribution pattern. The invasiveness -understood as  
44 the ability to transmigrate deep into spheroids- was not a transferable feature

45 between strains, neither by soluble or secreted factors nor by co-cultivation of  
46 trypomastigotes from invasive and non-invasive strains. We also studied the  
47 transmigration of recent *T. cruzi* isolates from children that were born  
48 congenitally infected, which showed a high migrant phenotype while an isolate  
49 from an infected mother (that never transmitted the infection to any of her 3  
50 children) was significantly less migratory. Altogether, our results demonstrate  
51 that in a 3D microenvironment each strain presents a characteristic migration  
52 pattern and distribution of parasites in the spheroids that can be associated to  
53 their *in vivo* behavior. Certainly, the findings presented here could not have been  
54 studied with traditional 2D monolayer cultures.

55

## 56 **Author Summary**

57 *Trypanosoma cruzi* is the protozoan parasite that causes Chagas' disease, also  
58 known as American trypanosomiasis. Experimental models of the infection  
59 evidence that different strains of the parasite present different virulence in the  
60 host, which cannot be always reproduced in 2D monolayer cultures. Three  
61 dimensional (3D) cultures can be useful models to study complex host-parasite  
62 interactions because they mimic *in vitro* the microarchitecture of tissues and  
63 provide an environment similar to the encountered in natural infections. In  
64 particular, spheroids are small 3D aggregates of cells that interact with each  
65 other and with the extracellular matrix that they secrete resembling the original  
66 microenvironment both functionally and structurally. Spheroids have rarely been  
67 employed to explore infectious diseases and host-parasite interactions. In this  
68 work we studied how bloodstream trypomastigotes transmigrate through 3D

69 spheroids mimicking the picture encountered by parasites in tissues soon after  
70 leaving circulation. We showed that the behavior of *T. cruzi* trypomastigotes in  
71 3D cultures reflects their *in vivo* virulence: virulent strains transmigrate deeply  
72 into spheroids while non-virulent strains remain in the external layers of  
73 spheroids. Besides, this work demonstrates the usefulness of 3D cultures as an  
74 accurate *in vitro* model for the study of host-pathogen interactions that could not  
75 be addressed with conventional monolayer cultures.

76

## 77 **Introduction**

78 The protozoan parasite *Trypanosoma cruzi* is the etiological agent of Chagas  
79 disease, which currently affects about 8 million people. Chagas' disease is an  
80 endemic illness in Latin America that has spread worldwide in the past years.  
81 The infection usually develops as a chronic cardiac, digestive or neurologic  
82 pathology. The reason why symptoms appear 10 or more years after the initial  
83 infection, and only in ~40% of individuals, remains unsolved, but both host and  
84 parasite genetic background should have an impact on the disease outcome.  
85 Chagas disease is one of the main health problems in Latin America, causing  
86 more than 10000 deaths per year, and incapacity in infected individuals [1].

87 In humans, the infection initiates with trypomastigotes deposited on  
88 mucous or skin, along with triatomine bug faeces, when the insect vector feeds  
89 on blood. Trypomastigotes are able to invade any nucleate cells at the infection  
90 site. Once inside the cell, trypomastigotes differentiate to amastigotes, which are  
91 the intracellular and replicative form. After several division cycles, amastigotes  
92 differentiate again into trypomastigotes, the infected cells burst, and parasites

93 are released into the interstitial space. Trypomastigotes can either infect  
94 neighboring cells or spread distantly by circulation. Successive cycles of  
95 intracellular infection and replication followed by bloodstream trypomastigote  
96 dissemination are the hallmark of the initial acute phase, which drives the  
97 amplification of the parasitic load, and eventually produces the infection of  
98 organs and tissues [2]. The acute phase ends approximately 2-3 months after  
99 the initial infection, the time required by the host immune system to control  
100 parasitemia and clear most trypomastigotes from peripheral circulation.  
101 However, a chronic and persistent infection is already established, characterized  
102 by the presence of intracellular amastigotes essentially confined into tissues  
103 along with positive serologic tests [2,3].

104 The experimental murine model allowed to understand that during the  
105 acute phase, trypomastigotes disseminate from the inoculation site to almost all  
106 tissues, to render completely parasitized mice, few days after the initial infection  
107 [4]. This entails that trypomastigotes should be able to escape from peripheral  
108 circulation, cross the vascular endothelium and migrate through the extracellular  
109 matrix (ECM) to establish a tisular intracellular infection [5]. The effectiveness of  
110 trypomastigotes to cross biological barriers and migrate through tissues will  
111 impact on *T. cruzi* ability to produce a severe, moderate or mild tissue infection.  
112 This process -that can be linked to parasite virulence and dynamic of infection *in*  
113 *vivo*- is poorly understood. Some authors suggested that the rupture of the  
114 endothelial barrier is necessary for the infection of target tissues [6]. On the  
115 contrary, others showed that trypomastigotes traverse the endothelial barrier  
116 involving a transcellular traffic of trypomastigotes through endothelial cells,  
117 mediated by the activation of the bradykinin receptor 2, and without disturbing its

118 integrity nor its permeability [7]. Since different combinations of parasite and  
119 mouse strains present differential tissue colonization and target organs of  
120 damage [8,9], the differences between both proposed transmigration models  
121 could be attributed to the different strains employed. Either way, trypomastigote  
122 transmigration through tissues is an essential event for *T. cruzi* infection. Studies  
123 on *T. cruzi* transmigration have been very limited, probably because of the  
124 extremely simplicity of monolayers cultures and –on the other hand- the  
125 complexity of *in vivo* models, which present low spatio-temporal resolution.  
126 Three-dimensional (3D) cultures are physiologically relevant and a good  
127 alternative because they mimic the microarchitecture of tissues and can provide  
128 an environment similar to the encountered in natural infections [10].

129         Spheroids are small aggregates of cells that do not adhere to a culture  
130 substrate and grow in 3D. Cells interact with each other and secrete the  
131 extracellular matrix (ECM) in which they reside, resembling their original  
132 microenvironment both functionally and structurally [11,12]. Spheroids have  
133 been broadly employed and deeply contribute to understand mechanisms in  
134 cancer biology and immunology [13-15], but they have rarely been employed to  
135 explore infectious diseases and host-parasite interactions. Remarkably, the co-  
136 culture of spheroids of myocytes with *T. cruzi* trypomastigotes has demonstrated  
137 to be an accurate model of fibrosis and hypertrophy that adequately recreates  
138 the chronic chagasic cardiomyopathy [16,17]. In the present work we took  
139 advantage of the 3D spheroid technology to disclose how trypomastigotes  
140 transmigrate across tissues, which is a key process of the host-parasite interplay  
141 in the early steps of infection. We demonstrate that the invasiveness of

142 trypanomastigotes from different *T. cruzi* strains and isolates into spheroids can be  
143 associated with their *in vivo* behavior and virulence.

144

## 145 **Materials and Methods**

### 146 **Reagents and sera**

147 Ultrapure Agarose, Carboxy-fluoresceinsuccinimidyl ester (CFSE) and  
148 CellTrace™ Far Red (CTFR) were acquired from Invitrogen. Polyethylenimine  
149 (PolyAr87-PEI) transfection reagent was obtained from FFyB (University of  
150 Buenos Aires). Anti *T. cruzi* antisera developed in mice was generated in our  
151 laboratory and used along with goat anti-mouse conjugated to Alexa-488 or  
152 Alexa-647 (Molecular Probes).

### 153 **Parasites and conditioned media**

154 *T. cruzi* trypanomastigotes from different strains and DTUs employed were:  
155 SylvioX10, K98, Dm28, 193-733MM and 199-173BB (DTU TcI); Y (DTU TcII);  
156 185-748BB and 186-401BB (DTU TcV) and RA and CL Brener (DTU TcVI). All  
157 strains were DNA genotyped by PCR-RFLP of *TcSC5D* and *TcMK* genes (S1  
158 Fig), as described [18].

159 Parasites were routinely maintained by *in vitro* cultures on Vero cells as  
160 previously described [19], and trypanomastigotes harvested from supernatants.

161 Culture-derived trypanomastigotes were labeled with CellTrace™ CFSE as we  
162 previously described [20]. Trypanomastigotes were alternatively labelled with  
163 CellTrace™ Far Red CTFR (5 µM), essentially with the same protocol with slight

164 differences in the incubation time (20 min at 37°C, followed by the addition of 1  
165 ml of complete medium and an additional incubation of 5 min at 37°C in the  
166 dark). After labelling, the motility of parasites was controlled under light  
167 microscope. The percentage of labelled parasites and the fluorescence intensity  
168 of CFSE and CTFR was determined by flow cytometry.

169 *T. cruzi* derived conditioned medium (CM) was obtained by a previously  
170 standardized protocol [21]. In brief, cell-derived trypomastigotes ( $100 \times 10^6$ ) were  
171 washed with PBS, resuspended in 1 ml of MEM without serum (or MEM without  
172 parasites as control medium) and incubated for 6 h at 37°C in a 5% CO<sub>2</sub>  
173 humidified atmosphere. Then, parasites were pelleted by centrifugation and the  
174 cell-free supernatant (containing both extracellular vesicles as well as vesicle-  
175 free secreted material) was centrifuged twice for 10 min at 15000 xg. The  
176 clarified supernatant was filtered through a 0.45 µm syringe filter, to obtain the  
177 CM, which was aliquoted and stored at -70°C until use.

#### 178 **Cell culture and stable HeLaR2 cell line generation**

179 Vero, HeLa and HEK293T cells were grown in MEM (Gibco) supplemented with  
180 10% (v/v) fetal bovine serum (Natocor), 100 U/ml penicillin and 10 µg/ml  
181 streptomycin. Cells were maintained at 37°C in 5% CO<sub>2</sub> and 95% air in a  
182 humidified incubator. To obtain HeLa cells stably expressing LifeAct-RFP,  
183 permissive HEK293T cells were first employed to produce lentiviral particles  
184 packed with LifeAct-RFP, essentially as described by Gerber *et al* [22]. Briefly,  
185 HEK293T were seeded on 24-well plates ( $3 \times 10^4$  cells/well) and transfected 24 h  
186 later by the PEI method with a mix of 0.5 µg pCMV-dR8.9 DVpr (packaging  
187 plasmid), 0.05 µg pCMV-VSV-G (envelope plasmid) and 0.5 µg of the pLenti



188 LifeAct-RFP (transfer plasmid) per well. The supernatant containing lentiviral  
189 particles packed with LifeAct-RFP was collected at 48 and 72 h after  
190 transfection, precleared, and concentrated by centrifugation. HeLa cells ( $3 \times 10^4$   
191 cells/well) were transduced in MEM containing 10% FBS with a 0.3 m.o.i. of  
192 lentiviral particles, and expanded in culture flasks. Cells expressing LifeAct-RFP  
193 (HeLaR) were sorted by flow cytometry, and cloned by limiting dilution. The  
194 clone number 2 (HeLaR2) stably expressing LifeAct-RFP was selected and  
195 employed for all the experiments.

### 196 **HeLa spheroids and infection model**

197 Spheroids of HeLaR2 cells were generated by the liquid overlay method [23].  
198 Cells (1000/well) were added to U-bottom 96-well plates coated with agarose 1%  
199 in PBS (w/v) and cultured in MEM 10% FBS. The formation of spheroids was  
200 controlled by microscopy from 24 h post seeding (S2 Fig). At 72 h, each well  
201 contained one spheroid of 300-400  $\mu\text{m}$  diameter, conformed by  $\approx 9000$  cells.

202 For *T. cruzi* infection, twelve spheroids were placed on each well of an agarose  
203 pre-coated p24 plate and incubated with 1 or 10 m.o.i. of trypomastigotes (or  
204 control medium) for 1 or 24 h, in MEM supplemented with 4% FBS. When  
205 appropriate, 100  $\mu\text{l}$  of medium was replaced by 100  $\mu\text{l}$  of CM. When indicated,  
206 2D-monolayers of HeLaR2 cells ( $10 \times 10^5$  cells/well) were incubated with 1 or 10  
207 m.o.i. of trypomastigotes also labelled with CFSE in a final volume of 500  $\mu\text{l}$  of  
208 MEM 4%.

209 For co-infection assays, 12 spheroids (in one p24 well) were simultaneously  
210 incubated with CL Brener and SylvioX10 for 24 h with 10 m.o.i. of each *T. cruzi*  
211 strain, labelled with a different stain.

### 212 **Cellular infection determined by flow cytometry**

213 Infected spheroids were collected in 1.5 ml tubes, washed three times with PBS  
214 and disaggregated by addition of 200  $\mu$ l 0,25% trypsin/EDTA for 10 min at 37°C.  
215 The cellular pellet -collected by centrifugation 10 min at 1000 x g- was washed  
216 three times and fixed in PBS 0.5% PFA. Infected 2D-monolayer cells were  
217 trypsinized and treated like 3D spheroids. Samples were acquired on a  
218 FACSCalibur (Becton Dickinson); gated HeLaR2 by forward and side scatter  
219 parameters were selected. A total of 10,000 events were analyzed for each  
220 condition. FL1- cells represented uninfected HeLaR2 cells while FL1+  
221 represented cells infected (either with intracellular parasites and/or attached to  
222 cell membrane) with CFSE-labelled parasites, FL4+ cells were those infected  
223 with CTFR-labelled parasites. Data was analyzed using FlowJo v10.0.7  
224 software. Statistical significance was determined by two-tailed unpaired student *t*  
225 *test* (Prism, GraphPad Software).

### 226 **Quantification of free-parasites inside spheroids**

227 Infected spheroids disaggregated by trypsin treatment were centrifuged for 10  
228 min at 5700 x g to collect HeLaR2 cells and parasites that were infecting or  
229 attached to HeLa cells, as well as parasites that were free inside spheroids (i.e.  
230 not associated to cells but inside spheroids). The pellet was then analysed by  
231 confocal microscopy to determine infected cells as well as free parasites  
232 (expressed as number of free-parasites for each 100 HeLaR2 cells). Statistical  
10

233 significance was determined by two-tailed unpaired student *t test* (Prism,  
234 GraphPad Software).

### 235 **Parasitic load into spheroids**

236 The total cargo of parasites inside the spheroids, either infecting cells or free in  
237 the ECM, was determined by qPCR. For doing so, each treatment was carried  
238 out by duplicate: one sample was used to determine the parasite load  
239 associated to spheroids (sample 1) while the other was used to determine the  
240 total cargo of parasites in the well (sample 2: parasites associated to spheroids  
241 plus parasites free in the medium/well). Infection was carried out as mentioned  
242 above. After 24 h, spheroids from sample 1 were collected in 1,5 ml tubes and  
243 carefully washed five times with sterile PBS to eliminate parasites from the  
244 supernatant avoiding the disassembling of spheroids. Instead, for sample 2  
245 spheroids and medium were collected together, centrifuged for 10 min at 5700 x  
246 g and the pellet washed with sterile PBS. Samples were subjected to a standard  
247 salting out protocol to obtain genomic DNA [24]. gDNA concentration was  
248 measured using Nanodrop and 50 ng were used in each qPCR reaction, which  
249 were carried out with Kapa Sybr Fast Universal Kit (Biosystems) in a 7500 Real  
250 Time PCR System (Applied Biosystems). The *T. cruzi* single copy gene *PCD6*  
251 (TcCLB.507099.50) was amplified with primers v099.50bFw  
252 (CAGGCATCACCGTATTTTCCA) and 099.50bRev  
253 (CTCTTGTTCCGTGCCAAACA) [25]. To determine *T. cruzi* DNA (*TcDNA*)  
254 abundance, DNA content was normalized to human *GAPDH* gene (53MFZ-  
255 GAPDHFw: ACCACCCTGTTGCTGTAGCCAAAT and 54MFZ-Rev:  
256 GACCTGACCTGCCGTCTAGAAAAA). Results were analysed with the LinReg

257 software [26]. The percentage of *TcDNA* inside spheroids was calculated as  
258  $X\% = TcDNA_{\text{sample1}} \times 100 / TcDNA_{\text{sample2}}$  and expressed as mean  $\pm$  SD of three  
259 independent experiments. Statistical significance was determined by student *t*  
260 *test* (GraphPad software).

## 261 **Parasite invasiveness and dissemination**

262 Infected spheroids were fixed by adding PFA to a 3.2% final concentration and  
263 incubated at 37°C for 1.5 h. Then, spheroids were washed with PBS as  
264 described previously [20] and mounted. Fluorescence images were acquired  
265 with a confocal Olympus FV1000 microscope. CFSE or CTFR labelled parasites  
266 were imaged with a 488 nm or 647 nm laser, respectively, while HeLaR2 cells  
267 were imaged at 530 nm. Z-stacks were collected with a 10x objective from 0 to  
268 150  $\mu\text{m}$  in depth with 2  $\mu\text{m}$  intervals in the vertical z-axis. Alternatively, images  
269 were acquired with a 40x objective, and the spheroid was scanned at 10, 30 and  
270 50  $\mu\text{m}$  in depth from the surface. To determine the localization of parasites,  
271 spheroids were analyzed with a 60x objective and Z-stacks were collected at 0.2  
272  $\mu\text{m}$  intervals in the z-axis. All images were analyzed with ImageJ [27] software;  
273 3D reconstructions and 3D-movies were generated with the 3D-viewer plugin.

## 274 **Electron microscopy**

275 Infected spheroids were fixed in 4% PFA and serially dehydrated with increasing  
276 ethanol solutions (10-100 %) followed by critical point drying with carbon dioxide.  
277 Samples were then coated with 60%/40% palladium/gold and acquired with a  
278 scanning electron microscope (Philips - XL Serie 30).

279

## 280 **Free-swimming assay**

281 Trypomastigotes ( $15 \times 10^6$ ) were resuspended in 5 ml MEM 4% SFB, transferred  
282 to round-bottom centrifuge tubes (Oak Ridge Style) and centrifuged at 2,500 x g  
283 for 8 min, which resulted in parasites at the bottom of the tubes forming a thin  
284 pellet. The tubes were then incubated 2 h at 37°C, to allow trypomastigotes to  
285 freely swim. Aliquots of 1 ml were carefully taken from the top (layer 5) to the  
286 bottom; the pellet was resuspended in 1 ml of medium. Parasites in each fraction  
287 were enumerated by counting in a Neubauer chamber.

## 288 **Statistical analysis**

289 All statistical analyses and graphs were performed with GraphPad Prism 7  
290 (GraphPad Software, USA). We used a two-tailed unpaired *t* test when the  
291 means of two groups were compared. When more than 2 groups were  
292 compared, we used two-way ANOVA with Bonferroni multiple comparison test.  
293 Significant differences were designed when P-value (P) n.s.  $\geq 0.05$ , \* $p < 0.05$ ,  
294 \*\* $p < 0.01$ , \*\*\* $p < 0.001$ .

295

## 296 **Results**

297 ***T. cruzi* trypomastigotes are less infective in 3D spheroids than in 2D**  
298 **monolayer cultures.**

299 *Trypanosoma cruzi* presents a high genetic heterogeneity and, currently,  
300 *T. cruzi* strains are classified into six clusters or discrete typing units (DTUs),  
301 named TcI to TcVI [28]. We selected CL Brener (DTU TcVI) and SylvioX10 (DTU  
302 TcI) strains, of high and low virulence, respectively, and whose biologically  
303 distinctive behavior in experimental models of *T. cruzi* infection is well

304 characterized [8,29-31].

305 HeLa cells constitutively expressing LifeAct-RFP (HelaR2 hereon), along  
306 with trypomastigotes labelled with CFSE or CTFR were employed to monitor  
307 short-time infection dynamics and host-parasite interactions (Fig 1). We first  
308 evaluated the infection profile of trypomastigotes both on conventional 2D  
309 monolayers and in 3D spheroids (Fig 2). While on conventional 2D monolayer  
310 cultures CL Brener and SylvioX10 parasites showed similar infection rates  
311 (~70%) (Fig 2A,C), both strains were much less effective to infect 3D spheroids  
312 (Fig 2B,C) and with differences between both strains. Infection with CL Brener  
313 rendered higher number of cells with cell-attached or internalized parasites  
314 (38,2% CL Brener vs 8,5% SylvioX10), as detected by flow cytometry of  
315 disaggregated spheroids (Fig 2B). The total cargo of parasites inside the  
316 spheroids, which includes intracellular parasites, surface attached, as well as  
317 free parasites migrating inside spheroids through the extracellular matrix, was  
318 also higher on CL Brener than SylvioX10 infected spheroids (48% vs 18%,  
319 determined by qPCR; Fig 2D). Differences between strains were also registered  
320 when free-parasites (i.e. not associated to cells) inside spheroids were  
321 enumerated (Fig 2E-F). Altogether, these results evidence that both strains have  
322 different abilities to infect 3D cultures, being CL Brener strain 2-3 fold more  
323 infectious than SylvioX10. These findings were also registered with different  
324 multiplicity of infection, and contrast with the similar behavior of both strains on  
325 monolayer cultures (S3 Fig).

326 **Trypomastigotes from different strains disseminate differentially inside**  
327 **spheroids.**

328 A panoramic view of spheroids, reconstructed from confocal stacks shows that  
329 SylvioX10 trypomastigotes were preferentially localized at the spheroid surface.  
330 Parasites were mostly focalized in large clumps that resembled a “patch-like”  
331 distribution pattern (Fig 3A, S1 movie). By contrast, CL Brener parasites were  
332 evenly distributed all over the surface of spheroids (Fig 3B, S2 movie).

333 The transmigration and invasiveness of trypomastigotes was analyzed by  
334 scanning the spheroids by confocal microscopy. Most SylvioX10 trypomastigotes  
335 were retained at spheroid surface or at the first layers of cells, and only scarce  
336 trypomastigotes were detected up to 30  $\mu\text{m}$  in depth (Fig 3C). On the other  
337 hand, CL Brener parasites were able to deepen into spheroids: migrated  
338 uniformly and were easily detected up to 50  $\mu\text{m}$  in depth (Fig 3D). The migration  
339 through the spheroid seems to be a fast movement because similar patterns  
340 were observed from 1 h post infection (S4 Fig). In brief, confocal scanning  
341 evidenced that CL Brener trypomastigotes can efficiently transmigrate deeply  
342 into spheroids, while SylvioX10 is retained at the surface, which corresponds  
343 with the differential virulence of both strains.

344 **Trypomastigotes of high migratory CL Brener strain use a paracellular**  
345 **migration route to move inside spheroids.**

346 To answer how trypomastigotes spread within spheroids, we analyzed the  
347 parasite-spheroid interaction with higher resolution techniques, such as scanning  
348 electron microscopy (SEM) and higher power snapshots by confocal  
349 microscopy.

350 As evidenced by confocal microscopy, SEM images also showed numerous  
351 SylvioX10 parasites attached to the surface of individual cells (Fig 4A, panels b,

352 c; white arrows). Notably, CL Brener trypomastigotes were predominantly caught  
353 entering into spheroids through the space between cell-cell junctions (Fig 4A,  
354 panels e, f; white asterisks). Spheroids infected with SylvioX10 also presented  
355 multiple intracellular amastigotes in the superficial layers -first 10  $\mu\text{m}$ - of cells  
356 with an untidy distribution (Fig 4B panels a, b and c; 4C and S3 movie).  
357 Confocal slices of spheroids infected with CL Brener made evident that there is  
358 an orderly distribution pattern around cell-cell contacts (Fig 4B panels d, e, f;  
359 white asterisks). At shorter times, CL Brener trypomastigotes were plainly  
360 observed in the space between cells, on their way through the extracellular  
361 matrix, suggesting a paracellular route of transmigration within the spheroid (Fig  
362 4D and S4 and S5 movies). CL Brener trypomastigotes were also detected  
363 intracellularly, though fastened to the cellular membrane (S6 movie).

#### 364 **The capacity of transmigration is not transferable between strains.**

365 CL Brener and SylvioX10 strains presented not only dissimilar invasiveness  
366 profiles, but also their allocation at the superficial layers of spheroids was very  
367 distinctive (Fig 3 and 4). We then investigated if transmigration could be  
368 transferred from the highly migrant CL Brener strain to the low migrant  
369 SylvioX10, through soluble or secreted factors or by co-cultivation of both strains  
370 (Fig 5). Interestingly, each strain retained its own dissemination pattern (Fig 5A)  
371 and rate of infection (Fig 5B) irrespective of the presence (or absence) of the  
372 other strain. Conditioned media (including both soluble and vesicle-contained  
373 secreted factors) from CL Brener or SylvioX10 did not cause changes in the  
374 invasiveness pattern or percentage of infected cells (S5 Fig). Together, these  
375 results indicate that the transmigration capacity of *T. cruzi* is a strain-specific trait  
376 that cannot be transferable by soluble or secreted factors, nor through co-



377 cultivation of migrant and non-migrant trypomastigotes.

378 **Transmigration deep inside spheroids can be linked to virulence.**

379 To evaluate if the differential transmigration profile could be linked to parasite  
380 DTU or virulence, the transmigration into spheroids of other well characterized *T.*  
381 *cruzi* strains was also analyzed. Low virulent strains (K98 and Dm28; TcI)  
382 presented low ability to transmigrate into spheroids (Fig 6). In contrast, virulent  
383 strains (RA [TcVI] and Y [TcII]) showed a transmigration pattern resembling the  
384 observed for CL Brener (Fig 6) (Fig 6A and S7 and 8 movies).

385 Finally, we analyzed the transmigration of four recent clinical isolates of *T. cruzi*.  
386 One isolate was derived from a *T. cruzi*-infected mother that after several  
387 pregnancies never delivered an infected child (isolate 773MM, TcI; non-  
388 congenital transmission). The other isolates, derived from babies that were born  
389 congenitally infected (isolates 173BB, TcI; 748BB, TcV; and 401BB, TcV;  
390 congenital transmission) [32]. The non-congenital isolate (733MM) [32] showed  
391 a low ability to migrate deep inside spheroids. Also, a “patch-like” distribution  
392 pattern, similar to the observed with SylvioX10 strain was observed (Fig 7B). In  
393 contrast, congenitally isolated parasites presented a highly migrant phenotype.  
394 Either DTU TcI or TcV isolates from congenitally infected babies were found  
395 deeply inside spheroids and easily visualized along the first 50 µm in depth (Fig  
396 7A).

397 The cellular infection produced by 733MM was ~20%, a value near the one  
398 registered with the low virulent SylvioX10 strain, while the 40% of infection of  
399 cells in spheroids produced by congenital isolates resembled the infection  
400 produced by CL Brener strain (Fig 7C).

401 Ultimately, because trypomastigotes of different strains behave differently when  
402 they are allowed to swim freely in the medium, we analyzed parasite motility as a  
403 possible trait linked to invasiveness within spheroids (S6 Fig). We consider a  
404 strain (or isolate) as poor motile when more than 20% of the parasites remain at  
405 the pellet in this assay. Although the swimming ability of SylvioX10 and CL  
406 Brener strains were considerably different and agree with their behavior in  
407 spheroids, other strains showed no association between the transmigration  
408 inside spheroids and their swimming ability (for example, up to 60% of parasites  
409 from 173BB and 401BB -congenital isolates highly migrant in spheroids-  
410 remained between the pellet and layer 1).

411

## 412 **Discussion**

413 The infection with the protozoan parasite *Trypanosoma cruzi* evolves from  
414 a short acute to a long lasting chronic phase when cardiac, neurological or  
415 intestinal disorders become evident [3]. Although the pathology appears only at  
416 the chronic phase, the infection of tissues initiates during acute phase and is the  
417 consequence of the early dissemination of trypomastigotes. Indeed, *T. cruzi* can  
418 disseminate and establish an intracellular infection in any tissue of the  
419 mammalian host [5]. To accomplish this, trypomastigotes must migrate and  
420 actively cross several biological barriers, from the initial infection site to the  
421 target organs of damage, where parasites replicate intracellularly as amastigotes  
422 [2]. Murine experimental models of *T. cruzi* infection have helped to understand  
423 that some parasite strains present tropism for certain tissues or organs while  
424 others are essentially pantropic and can colonize indistinctly any tissue [5,33,34].

425 Usually, pantropic strains are more virulent in the murine model. It can be  
426 inferred that, since those strains colonize a broader range of tissues, they are  
427 also more efficient in the transmigration process. However, how trypomastigotes  
428 transmigrate, the mechanisms underlying this process and its significance in the  
429 host-parasite interplay are poorly understood.

430 In this work, we employed 3D cultures to mimic the tissular  
431 microarchitecture encountered by trypomastigotes in the mammalian host during  
432 its *in vivo* life cycle. We studied the process of transmigration and dissemination  
433 of the parasites across spheroids for the first time, and demonstrate a link  
434 between 3D transmigration and *in vivo* behavior. Strains or isolates that are  
435 more virulent *in vivo* (in natural or experimental infections) transmigrated deeper  
436 inside spheroids than no virulent strains. In an *in vivo* infection, the ability to  
437 transmigrate will favour pathogen dissemination into the host, at the same time  
438 that parasites evade the immune system and increase the opportunity to find an  
439 adequate microenvironment to settle for the tissular infection [35-38].

440 By employing the 3D spheroid model, we focused on one hand in the  
441 ability of *T. cruzi* strains to infect mammalian cells (evaluated by flow cytometry  
442 as cells with either internalized or attached parasites). On the other hand, we  
443 also examined the invasiveness of trypomastigotes, which means how deep  
444 inside the spheroids trypomastigotes are detected. Somehow both events  
445 (invasiveness and infection) are linked by the fact that *T. cruzi* strains that were  
446 highly migrant were also those that presented higher infection rates, probably  
447 because the transmigration was a necessary step to infect the cells located deep  
448 inside the spheroids. This fact can also explain why poorly migrant strains

449 presented low infection rates in the 3D model, irrespective of their accurate  
450 infection rate in conventional 2D monolayer cultures. However, considering the  
451 times at which transmigration was analyzed, it is unlikely that transmigration was  
452 the result of cellular invasion and replication of parasites. We postulate the  
453 transcellular and paracellular transmigration routes as two possible ways for  
454 trypomastigotes to reach the deeper layers of spheroids. Even more, we  
455 speculate that how *T. cruzi* transmigrates can be also a strain dependent trait  
456 and that different strains or isolates can employ differential transmigration  
457 strategies. Electronic microscopy images strongly suggest that CL Brener strain  
458 goes through spheroids by a paracellular route, without crossing the cells but  
459 between cell-cell junctions. Although the biological significance of this  
460 transmigration strategy should be carefully studied, we hypothesize that the  
461 paracellular route would allow the parasite to internalize into the tissues without  
462 disrupting the cellular homeostasis and, therefore, without triggering an  
463 inflammatory response. Moreover, a paracellular route would be a faster  
464 transmigration mechanism for trypomastigotes to find their target allocation  
465 inside tissues, without the need to invade and replicate intracellularly. In line with  
466 these results, Coates et al (2013) showed that *T. cruzi* trypomastigotes can  
467 cross a monolayer of endothelial cells without cell damage. They suggested that  
468 this process might be mediated by the protease cruzipain, which can convert  
469 kininogen to bradykinin (involved in endothelial permeability) [7]. The picture of  
470 trypomastigotes distribution was very distinctive between CL Brener and  
471 SylvioX10 strains, even from the initial steps of interaction with mammalian cells  
472 in our 3D model. While CL Brener trypomastigotes are regularly distributed and  
473 positioned in between cell-cell junctions on the external layers of the spheroid

474 surface, SylvioX10 trypomastigotes are grouped in patches of several parasites  
475 stuck over the cells. Previous works with *Trypanosoma brucei* evidenced that  
476 trypomastigotes can cross the blood brain barrier both by transcellular and  
477 paracellular routes, promoting the expression of ICAM-1 and VCAM-1 [39-41].  
478 On the other hand, *T. gondii* employs a paracellular route for tissue  
479 transmigration, through the interaction between TgMIC2 and host occludins from  
480 TJs and ICAM-1[42,43]. Interference with the transmigration process avoids *in*  
481 *vivo* infectivity both in *T. gondii* and *P. falciparum* [44,45]. Interestingly, the loss  
482 of genes associated with transmigration in *P. falciparum* did not impair cellular  
483 invasion, supporting the idea that tissue invasiveness and cellular infection can  
484 be two independent processes [45].

485 Trypomastigote's motility can be understood as its ability to present a  
486 directional movement, which in turn could impact on the cellular infection rates.  
487 We found a pronounced difference in swimming motility between SylvioX10 (low  
488 migrant and low motile) and CL Brener (high migrant and high motile)  
489 trypomastigotes. However, analyses of a broader panel of strains demonstrated  
490 that transmigration cannot be solely explained by the motile ability of  
491 trypomastigotes. Presumably, transmigration depends both on motility and  
492 migration of the parasite as well as on its interaction with the surrounding  
493 microenvironment. In this sense, Barragan *et al*, (2002) showed that a high  
494 migration rate of *T. gondii* is associated with a highly virulent phenotype [46].  
495 Indeed, correlation between high virulent strains and congenital toxoplasmosis  
496 has also been noted [47,48]. On the other hand, Éva Dórá et al (2019) have very  
497 recently evaluated the migration of trypomastigotes of *T. carassii* in an *in vivo*  
498 model. This awesome work clearly shows that the movement of parasites inside

499 zebrafish occurs through the interstitial space and how its density and  
500 compaction determines the direction of trypomastigotes migration [49].

501         During congenital transmission of *T. cruzi* infection, trypomastigotes must  
502 cross epithelial and connective tissues that compose the placental barrier to gain  
503 access to and infect the fetus. Therefore, transplacental infection is another  
504 aspect of *T. cruzi*-host interplay that is associated with parasite transmigration.  
505 We have characterized the invasiveness inside spheroids of isolates recently  
506 obtained from babies born with congenital Chagas disease. We demonstrated  
507 that the congenital isolates were highly invasive into spheroids, in contrast with  
508 the isolate obtained from a mother, which after delivered several children never  
509 transmitted the infection to her offspring, which showed a low/moderate  
510 transmigration ability. *T. cruzi* congenital transmission is the result of a complex  
511 interaction between trypomastigotes and the placental barrier [50-52]. Recently,  
512 Juiz et al (2017) described a differential placental gene response induced by  
513 strains with different tropism and virulence. They reported that a strain that was  
514 isolated from a human case of congenital infection (VD) presented higher  
515 tropism by the murine placenta than a non-virulent and myotropic strain (K-98)  
516 [53]. In our 3D model, K-98 strain showed a low migrant phenotype. Although we  
517 did not analyze the transmigration profile of VD strain, all the congenital isolates  
518 assayed here were highly migrant.

519         The intratisular migration is key during the development of metastasis  
520 and it has been approached in several studies on cancer [54]. Tumoral cells  
521 produce and prompt to the secretion of cytokines and proteases that will favour  
522 the migration across different biological barriers. Proteases are necessary to

523 disrupt cell-cell junctions, extracellular matrix and the basal lamina [55]. Although  
524 little is known about the transmigration process in host-pathogen interactions,  
525 the secretion of proteases could also be required to disrupt intercellular junctions  
526 and extracellular matrix for *T. cruzi* transmigration. However, in our experimental  
527 conditions, the invasiveness was not a transferable feature between strains,  
528 neither by soluble or secreted factors nor by co-cultivation of invasive and non-  
529 invasive trypomastigotes. This observation suggests that unsecreted and strain  
530 specific factors are required to transmigrate into the spheroids, while it does not  
531 exclude the involvement of proteases and other soluble factors. Differentially-  
532 expressed and/or strain specific membrane-associated molecules from  
533 trypomastigotes might be targets to be evaluated in the near future.

534         Altogether, our results demonstrated that in a 3D microenvironment each  
535 strain presents a characteristic migration pattern and tissular distribution that  
536 could be associated to their *in vivo* behavior. Our work also validates the  
537 accuracy and utility of the 3D spheroid model to study complex host-parasite  
538 interactions. Certainly, the findings presented here could not have been studied  
539 with traditional 2D monolayer cultures.

540

## 541 **Acknowledgements**

542         We acknowledge L. Sferco and A. Chidichimo for technical assistance  
543 with *in vitro* parasite cultures, and V. Campo and G.V. Levy for advice in qPCR  
544 assays. We are grateful to A.M.M. Massaldi for checking the English version of  
545 the manuscript. This work was supported by grants from Agencia Nacional de

546 Promoción Científica y Tecnológica / Fondo para la Investigación Científica y  
547 Tecnológica -ANPCyT/FONCyT- (PICT-2016-0108 to VT and PICT 2017-2644  
548 to MER) from Argentina. The funders had no role in study design, data collection  
549 and analysis, decision to publish, or preparation of the manuscript.

550

## 551 **References**

- 552 1. OPS OMS | Enfermedad de Chagas. 2015. Available from:  
553 [http://www.paho.org/hq/index.php?option=com\\_topics&view=article&id=10](http://www.paho.org/hq/index.php?option=com_topics&view=article&id=10)  
554 [&Itemid=40743&lang=es](http://www.paho.org/hq/index.php?option=com_topics&view=article&id=10&Itemid=40743&lang=es)
- 555 2. Andrade LO, Andrews NW. Opinion: The Trypanosoma cruzi–host-cell  
556 interplay: location, invasion, retention. *Nat Rev Microbiol.* 2005; 3(10):819–  
557 23.
- 558 3. Rassi A, Rassi A, Marin-Neto JA, al. et, al. et, Guillen I de. Chagas  
559 disease. *Lancet.* 2010; 375(9723):1388–402.
- 560 4. Lewis MD, Francisco AF, Taylor MC, Jayawardhana S, Kelly JM. Host and  
561 parasite genetics shape a link between Trypanosoma cruzi infection  
562 dynamics and chronic cardiomyopathy. *Cell Microbiol* 2016; 18(10):1429–  
563 43.
- 564 5. Costa FC, Francisco AF, Jayawardhana S, Calderano SG, Lewis MD,  
565 Olmo F, et al. Expanding the toolbox for Trypanosoma cruzi: A parasite line  
566 incorporating a bioluminescence-fluorescence dual reporter and  
567 streamlined CRISPR/Cas9 functionality for rapid in vivo localisation and  
568 phenotyping. *PLoS Negl Trop Dis.* 2018; 12(4):e0006388.



- 569 6. Prado CM, Jelicks LA, Weiss LM, Factor SM, Tanowitz HB, Rossi MA. The  
570 vasculature in chagas disease. *Adv Parasitol.* 2011; 76:83–99.
- 571 7. Coates BM, Sullivan DP, Mekanji MY, Du NY, Olson CL, Muller WA, et al.  
572 Endothelial Transmigration by *Trypanosoma cruzi*. *PLoS One.* 2013;  
573 8(12):e81187.
- 574 8. Lewis MD, Fortes Francisco A, Taylor MC, Burrell-Saward H, McLatchie  
575 AP, Miles MA, et al. Bioluminescence imaging of chronic *Trypanosoma*  
576 *cruzi* infections reveals tissue-specific parasite dynamics and heart disease  
577 in the absence of locally persistent infection. *Cell Microbiol.* 2014;  
578 16(9):1285–300.
- 579 9. Santi-Rocca J, Gironès N, Fresno M. Multi-Parametric Evaluation of  
580 *Trypanosoma cruzi* Infection Outcome in Animal Models. In: *Methods in*  
581 *molecular biology* (Clifton, NJ). 2019. p. 187–202.
- 582 10. Shamir ER, Ewald AJ. Three-dimensional organotypic culture: experimental  
583 models of mammalian biology and disease. *Nat Rev Mol Cell Biol.* 2014;  
584 15(10):647–64.
- 585 11. Fennema E, Rivron N, Rouwkema J, van Blitterswijk C, de Boer J.  
586 Spheroid culture as a tool for creating 3D complex tissues. *Trends*  
587 *Biotechnol.* 2013; 31(2):108–15.
- 588 12. Zanoni M, Piccinini F, Arienti C, Zamagni A, Santi S, Polico R, et al. 3D  
589 tumor spheroid models for in vitro therapeutic screening: a systematic  
590 approach to enhance the biological relevance of data obtained. *Sci Rep.*  
591 2016; 6(1):19103.

- 592 13. Baruzzi A, Remelli S, Lorenzetto E, Segal M, Chignola R, Berton G. Sos1  
593 Regulates Macrophage Podosome Assembly and Macrophage Invasive  
594 Capacity. *J Immunol.* 2015; 195(10):4900–12.
- 595 14. Röhland S, Wechselberger A, Spitzweg C, Huss R, Nelson PJ, Harz H.  
596 Quantification of in vitro mesenchymal stem cell invasion into tumor  
597 spheroids using selective plane illumination microscopy. *J Biomed Opt.*  
598 2015; 20(4):040501.
- 599 15. Giannattasio A, Weil S, Kloess S, Ansari N, Stelzer EHK, Cerwenka A, et  
600 al. Cytotoxicity and infiltration of human NK cells in in vivo-like tumor  
601 spheroids. *BMC Cancer.* 2015; 15(1):351.
- 602 16. Garzoni LR, Adesse D, Soares MJ, Rossi MID, Borojevic R, Meirelles M de  
603 NL de. Fibrosis and Hypertrophy Induced by *Trypanosoma cruzi* in a  
604 Three-Dimensional Cardiomyocyte-Culture System. *J Infect Dis.* 2008;  
605 197(6):906–15.
- 606 17. M. Ferrão P, M. Nisimura L, C. Moreira O, G. Land M, Pereira MC, de  
607 Mendonça-Lima L, et al. Inhibition of TGF- $\beta$  pathway reverts extracellular  
608 matrix remodeling in *T. cruzi* -infected cardiac spheroids. *Exp Cell Res.*  
609 2018; 362(2):260–7.
- 610 18. Cosentino RO, Agüero F. A Simple Strain Typing Assay for *Trypanosoma*  
611 *cruzi*: Discrimination of Major Evolutionary Lineages from a Single  
612 Amplification Product. *PLoS Negl Trop Dis.* 2012; 6(7):e1777.
- 613 19. Bernabó G, Levy G, Ziliani M, Caeiro LD, Sánchez DO, Tekiel V. TcTASV-  
614 C, a Protein Family in *Trypanosoma cruzi* that Is Predominantly  
615 Trypomastigote-Stage Specific and Secreted to the Medium. *PLoS One.*

- 616 2013; 8(7):e71192.
- 617 20. Rodríguez ME, Rizzi M, Caeiro L, Masip Y, Sánchez DO, Tekiel V.  
618 Transmigration of *Trypanosoma cruzi* Trypomastigotes through 3D  
619 Spheroids Mimicking Host Tissues. In: Methods in molecular biology  
620 (Clifton, NJ). 2019. p. 165–77.
- 621 21. Caeiro LD, Alba-Soto CD, Rizzi M, Solana ME, Rodriguez G, Chidichimo  
622 AM, et al. The protein family TcTASV-C is a novel *Trypanosoma cruzi*  
623 virulence factor secreted in extracellular vesicles by trypomastigotes and  
624 highly expressed in bloodstream forms. PLoS Negl Trop Dis. 2018;  
625 12(5):e0006475.
- 626 22. Gerber PP, Cabrini M, Jancic C, Paoletti L, Banchio C, von Bilderling C, et  
627 al. Rab27a controls HIV-1 assembly by regulating plasma membrane levels  
628 of phosphatidylinositol 4,5-bisphosphate. J Cell Biol. 2015; 209(3):435–52.
- 629 23. Carlsson J, Yuhas JM. Liquid-overlay culture of cellular spheroids. Recent  
630 Results Cancer Res. 1984; 95:1–23.
- 631 24. Miller SA, Dykes DD, Polesky HF. A simple salting out procedure for  
632 extracting DNA from human nucleated cells. Nucleic Acids Res. 1988;  
633 16(3):1215.
- 634 25. Campo VA. Comparative effects of histone deacetylases inhibitors and  
635 resveratrol on *Trypanosoma cruzi* replication, differentiation, infectivity and  
636 gene expression. Int J Parasitol Drugs drug Resist. 2017; 7(1):23–33.
- 637 26. Ramakers C, Ruijter JM, Deprez RHL, Moorman AF. Assumption-free  
638 analysis of quantitative real-time polymerase chain reaction (PCR) data.

- 639 Neurosci Lett. 2003; 339(1):62–6.
- 640 27. Schneider CA, Rasband WS, Eliceiri KW. NIH Image to ImageJ: 25 years  
641 of image analysis. Nat Methods. 2012; 9(7):671–5.
- 642 28. Zingales B, Miles MA, Campbell DA, Tibayrenc M, Macedo AM, Teixeira  
643 MMG, et al. The revised *Trypanosoma cruzi* subspecific nomenclature:  
644 Rationale, epidemiological relevance and research applications. Infect  
645 Genet Evol. 2012; 12(2):240–53.
- 646 29. Marinho CRF, Nuñez-Apaza LN, Bortoluci KR, Bombeiro AL, Bucci DZ,  
647 Grisotto MG, et al. Infection by the Sylvio X10/4 clone of *Trypanosoma*  
648 *cruzi*: relevance of a low-virulence model of Chagas' disease. Microbes  
649 Infect. 2009; 11(13):1037–45.
- 650 30. Marinho CRF, Nuñez-Apaza LN, Martins-Santos R, Bastos KRB, Bombeiro  
651 AL, Bucci DZ, et al. IFN-gamma, But Not Nitric Oxide or Specific IgG, is  
652 Essential for the In vivo Control of Low-virulence Sylvio X10/4  
653 *Trypanosoma cruzi* Parasites. Scand J Immunol. 2007; 66(2–3):297–308.
- 654 31. Belew AT, Junqueira C, Rodrigues-Luiz GF, Valente BM, Oliveira AER,  
655 Polidoro RB, et al. Comparative transcriptome profiling of virulent and non-  
656 virulent *Trypanosoma cruzi* underlines the role of surface proteins during  
657 infection. PLoS Pathog. 2017; 13(12):e1006767.
- 658 32. Volta BJ, Bustos PL, Cardoni RL, De Rissio AM, Laucella SA, Bua J.  
659 Serum Cytokines as Biomarkers of Early *Trypanosoma cruzi* infection by  
660 Congenital Exposure. J Immunol. 2016; 196(11):4596–602.
- 661 33. Santi-Rocca J, Gironès N, Fresno M. Multi-Parametric Evaluation of

- 662 Trypanosoma cruzi Infection Outcome in Animal Models. 2019. p. 187–202.
- 663 34. Lewis MD, Francisco AF, Taylor MC, Kelly JM. A New Experimental Model  
664 for Assessing Drug Efficacy against Trypanosoma cruzi Infection Based on  
665 Highly Sensitive In Vivo Imaging. J Biomol Screen. 2015; 20(1):36–43.
- 666 35. Harker KS, Ueno N, Lodoen MB. Toxoplasma gondii dissemination: a  
667 parasite's journey through the infected host. Parasite Immunol. 2015;  
668 37(3):141–9.
- 669 36. Kumar H, Tolia NH. Getting in: The structural biology of malaria invasion.  
670 PLOS Pathog. 2019; 15(9):e1007943.
- 671 37. Drewry LL, Sibley LD. The hitchhiker's guide to parasite dissemination. Cell  
672 Microbiol. 2019; e13070.
- 673 38. Lambert H, Barragan A. Modelling parasite dissemination: host cell  
674 subversion and immune evasion by Toxoplasma gondii. Cell Microbiol.  
675 2010 Mar; 12(3):292–300.
- 676 39. Mulenga C, Mhlanga JD, Kristensson K, Robertson B. Trypanosoma brucei  
677 brucei crosses the blood-brain barrier while tight junction proteins are  
678 preserved in a rat chronic disease model. Neuropathol Appl Neurobiol.  
679 2001; 27(1):77–85.
- 680 40. Grab DJ, Nikolskaia O, Kim Y V., Lonsdale-Eccles JD, Ito S, Hara T, et al.  
681 African trypanosome interactions with an in vitro model of the human blood-  
682 brain barrier. J Parasitol. 2004; 90(5):970–9.
- 683 41. Nikolskaia O V., de A Lima APC, Kim Y V, Lonsdale-Eccles JD, Fukuma T,  
684 Scharfstein J, et al. Blood-brain barrier traversal by African trypanosomes

- 685 requires calcium signaling induced by parasite cysteine protease. *J Clin*  
686 *Invest.* 2006; 116(10):2739–47.
- 687 42. Weight CM, Jones EJ, Horn N, Wellner N, Carding SR. Elucidating  
688 pathways of *Toxoplasma gondii* invasion in the gastrointestinal tract:  
689 involvement of the tight junction protein occludin. *Microbes Infect.* 2015;  
690 17(10):698–709.
- 691 43. Barragan A, Brossier F, Sibley LD. Transepithelial migration of *Toxoplasma*  
692 *gondii* involves an interaction of intercellular adhesion molecule 1 (ICAM-1)  
693 with the parasite adhesin MIC2. *Cell Microbiol.* 2005; 7(4):561–8.
- 694 44. Huynh M-H, Carruthers VB. *Toxoplasma* MIC2 Is a Major Determinant of  
695 Invasion and Virulence. *PLoS Pathog.* 2006; 2(8):e84.
- 696 45. Yang ASP, O'Neill MT, Jennison C, Lopaticki S, Allison CC, Armistead JS,  
697 et al. Cell Traversal Activity Is Important for *Plasmodium falciparum* Liver  
698 Infection in Humanized Mice. *Cell Rep.* 2017; 18(13):3105–16.
- 699 46. Barragan A, Sibley LD. Transepithelial migration of *Toxoplasma gondii* is  
700 linked to parasite motility and virulence. *J Exp Med.* 2002 Jun  
701 17;195(12):1625–33.
- 702 47. Howe DK, Sibley LD. *Toxoplasma gondii* Comprises Three Clonal  
703 Lineages: Correlation of Parasite Genotype with Human Disease. *J Infect*  
704 *Dis.* 1995; 172(6):1561–6.
- 705 48. Fuentes I, Rubio JM, Ramirez C, Alvar J. Genotypic Characterization of  
706 *Toxoplasma gondii* Strains Associated with Human Toxoplasmosis in  
707 Spain: Direct Analysis from Clinical Samples. *J Clin Microbiol.* 2001;

708 39(4):1566–70.

709 49. Dóro É, Jacobs SH, Hammond FR, Schipper H, Pieters RP, Carrington M,  
710 et al. Visualizing trypanosomes in a vertebrate host reveals novel  
711 swimming behaviours, adaptations and attachment mechanisms. *Elife*.  
712 2019; 8. e48388.

713 50. Castillo C, Carrillo I, Libisch G, Juiz N, Schijman A, Robello C, et al. Host-  
714 parasite interaction: changes in human placental gene expression induced  
715 by *Trypanosoma cruzi*. *Parasit Vectors*. 2018;11(1):479.

716 51. Juiz NA, Torrejón I, Burgos M, Torres AMF, Duffy T, Cayo NM, et al.  
717 Alterations in Placental Gene Expression of Pregnant Women with Chronic  
718 Chagas Disease. *Am J Pathol*. 2018; 188(6):1345–53.

719 52. Bustos PL, Mildubegger N, Volta BJ, Perrone AE, Laucella SA, Bua J.  
720 *Trypanosoma cruzi* Infection at the Maternal-Fetal Interface: Implications of  
721 Parasite Load in the Congenital Transmission and Challenges in the  
722 Diagnosis of Infected Newborns. *Front Microbiol*. 2019; 10:1250.

723 53. Juiz NA, Solana ME, Acevedo GR, Benatar AF, Ramirez JC, da Costa PA,  
724 et al. Different genotypes of *Trypanosoma cruzi* prod1. Juiz NA, Solana  
725 ME, Acevedo GR, Benatar AF, Ramirez JC, da Costa PA, et al. Different  
726 genotypes of *Trypanosoma cruzi* produce distinctive placental environment  
727 genetic response in chronic experimental infecti. *PLoS Negl Trop Dis*.  
728 2017; 11(3):e0005436.

729 54. Stuelten CH, Parent CA, Montell DJ. Cell motility in cancer invasion and  
730 metastasis: insights from simple model organisms. *Nat Rev Cancer*. 2018;  
731 18(5):296–312.

732 55. Wolf K, Friedl P. Extracellular matrix determinants of proteolytic and non-  
733 proteolytic cell migration. *Trends Cell Biol.* 2011; 21(12):736–44.

734

735

## 736 **Figure captions**

### 737 **Fig 1. Model setup.**

738 (A) *Trypanosoma cruzi* SylvioX10 (DTU TcI) and CL Brener (DTU TcVI)  
739 trypomastigotes were labelled with CFSE: fluorescent images (left panel) and  
740 quantification by flow cytometry (right panel). Black histograms: non-labelled  
741 parasites; green histograms: CFSE labelled parasites. NS: Negative Staining.  
742 (B) Spheroid of HeLaR2 cells at 72 h post seeding. Scale bar = 100  $\mu$ m.

743

### 744 **Fig 2. Differential ability of SylvioX10 and CL Brener trypomastigotes to** 745 **infect 2D-monolayer vs 3D-spheroid cultures.**

746 HeLaR2 (grown as monolayers or as spheroids, see Material and Methods  
747 section) were incubated with 10 m.o.i. of CFSE-labelled CL Brener or SylvioX10  
748 trypomastigotes or non-infected (control). (A, B) At 24 h post infection, cells  
749 were trypsinized and the rate of infected HeLaR2 cells (either with internalized or  
750 attached parasites) was determined by flow cytometry. (C) Quantification of  
751 three independent experiments carried out as described for A and B. (D)  
752 Quantification of the total parasite cargo inside spheroids, which includes both  
753 cell-associated parasites and free parasites inside spheroids from three  
754 independent experiments. At 24 h post infection either intact spheroids or the



755 whole content of the well (intact spheroids plus culture media with non-  
756 internalized parasites) were harvested and total DNA purified. Parasite content  
757 was estimated on the basis of qPCR of a single copy *T. cruzi* gene (*PCD6*,  
758 TriTryp gene ID: TcCLB.507099.50). Percentage of *T. cruzi* DNA inside  
759 spheroids respect to total *T. cruzi* DNA in the well was calculated. (E) Free  
760 parasites inside spheroids infected with CL Brener or SylviX10, at 24 h p.i.  
761 Representative confocal images of disaggregated spheroids, white arrows:  
762 magnified cells; white asterisks: free parasites. (F) Quantification of free  
763 parasites released from disaggregated spheroids. Data expressed as number of  
764 free-parasites for each 100 HeLaR2 cells. Graphs represent the mean  $\pm$  SD of  
765 three independent experiments *t test*, \* $p < 0.05$ , \*\* $p < 0.01$ , \*\*\* $p < 0.001$ .

766

767 **Fig 3. Differential dissemination pattern within spheroids of different**  
768 **strains of *T. cruzi*.**

769 (A and B). 3D reconstruction of HeLaR2 spheroids infected with CFSE-  
770 SylvioX10 or CFSE-CL Brener trypomastigotes. Z-stack images were obtained  
771 by confocal microscopy. The distribution on the surface (X-Y left image), the  
772 side plane (Z-Y middle image) and inside the spheroid (Y-X right image,  
773 transversal view) are shown. Green: CFSE-trypomastigotes. Red: LifeAct-RFP  
774 of HeLa cells. (C and D) Representative images of three confocal planes  
775 obtained at 10, 30 and 50  $\mu\text{m}$  in depth on the z axis (40x objective). The detailed  
776 distribution pattern of parasites is observed -green fluorescence-. Scale bar: 100  
777  $\mu\text{m}$ .

778

779 **Fig 4. Differential host cell-parasite interaction pattern of different strains**  
780 **of *T. cruzi* on the spheroid surface.**

781 Spheroids were cultured with CFSE-SylvioX10 or CFSE-CL Brener. (A) Cell-  
782 parasite interaction on the surface of infected spheroids after 24 h of infection.  
783 SEM microscopy showing the whole surface of infected spheroids (images a and  
784 d) or detailed cell-parasite interactions (b-c for SylvioX10 and e-f for CL Brener)  
785 are shown. White arrows show groups of parasites on the surface of SylvioX10  
786 infected spheroids. White asterisks show CL Brener parasites located in the site  
787 of cell cell-cell contact. Scale bar for a and d: 100  $\mu\text{m}$ ; b and c: 10  $\mu\text{m}$ ; d: 100  
788  $\mu\text{m}$ ; e: 10  $\mu\text{m}$ : f: 5  $\mu\text{m}$ . (B) Confocal microscopy capturing cell infection at 10  $\mu\text{m}$   
789 of infected spheroids with 60x objective. The distribution pattern of parasites on  
790 the surface of infected spheroids is observed in a and d images for SylvioX10  
791 and CL Brener, respectively. Blue arrows show magnified insets (b-c for  
792 SylvioX10 and e-f for CL Brener). Yellow asterisks show multi-infected cells.  
793 White asterisks show cell-cell contact associated parasites. Scale bar = 15  $\mu\text{m}$ .  
794 (C) Multi-infected cell on the surface of SylvioX10 infected spheroids was  
795 reconstructed in 3D. Multiple intracellular amastigotes can be observed. (D)  
796 Spheroids of HeLaR2 cells were incubated with CFSE-CL Brener  
797 trypomastigotes for 1h and then photographed by confocal microscopy. CFSE-  
798 trypomastigotes in the paracellular space both in fluorescence images (a) as well  
799 as in bright light (b) are shown. Scale bar 15  $\mu\text{m}$ .

800

801 **Fig 5. Invasiveness within spheroid is an intrinsic feature of each strain,**  
802 **not complemented in trans.**

803 Spheroids of HeLaR2 cells were incubated with CFSE-CL Brener, CTFR-CL  
804 Brener, CFSE-SylvioX10 or CTFR-SylvioX10 or simultaneously co-incubated  
805 with both strains labelled with different dyes. (A) Representative images of  
806 three confocal planes obtained at 10, 30 and 50  $\mu\text{m}$  in depth -on the z axis- with  
807 a 40x objective. Cyan: CTFR-SylvioX10; green: CFSE-CL Brener; red: HeLaR2  
808 cells. Magnified insets (a-d) are shown in the right panels. Scale bar = 100  $\mu\text{m}$ .  
809 (B) The same assay as described in A but spheroids were disaggregated and  
810 cells with either attached or internalized parasites were quantified by flow  
811 cytometry. Infections with one (mono-infections) or both strains simultaneously  
812 (co-infections) were carried out also with interchanged dyes. The percentage of  
813 infected cells was significantly different between SylvioX10 and CL Brener  
814 parasites in all conditions tested. On the other hand, no differences in the  
815 infection rate for each strain, both with the use of different staining dyes, as well  
816 as, during the mono infections versus the co-infections were observed. Graphs  
817 represent the mean  $\pm$  SD of three independent experiments. Data were analyzed  
818 by one-way ANOVA followed by Bonferroni's multiple comparison test.

819

820 **Fig 6. The capacity of dissemination is linked to virulence.**

821 Spheroids of HeLaR2 cells were incubated with k98, Dm28c, Y or RA strains for  
822 24 h. Three confocal planes were obtained at 10, 30 and 50  $\mu\text{m}$  in depth -on the  
823 z axis- with 40x objective. The detailed distribution pattern of parasites is  
824 observed. 3D-reconstruction is shown in lower panels. Green: CFSE labeled  
825 parasites. Red: LifeAct-RFP. Scale bar = 100  $\mu\text{m}$ .

826

827 **Fig 7. Congenital trypomastigotes are more invasive and infective than**  
828 **non-congenital parasites.**

829 Spheroids of HeLaR2 cells were incubated with 733MM, 173BB, 401BB or  
830 748BB recent clinical isolates for 24 h. (A) Confocal planes were obtained at 10,  
831 30 and 50  $\mu\text{m}$  in depth -on the z axis- with 40x objective. The detailed  
832 distribution pattern of parasites is observed. Scale bar = 100  $\mu\text{m}$ . (B) Three-D-  
833 reconstruction of infected spheroids with each strain is shown. Green: CFSE  
834 labeled parasites. Red: LifeAct-RFP. (C) Percentage of infected HeLaR2 cells to  
835 compare infectivity of non-congenial vs congenial isolated. Pink and blue bars  
836 show SylvioX10 and CL Brener % of infection, respectively, as comparison  
837 points. Graphs represent the mean  $\pm$  SD of three independent experiments.

838

839 **Supporting information captions**

840

841 **S1 Fig. Genotyping of *T. cruzi* strains and isolates** (according to Cossentino  
842 et al, 2012).

843 (A) TcSC5D amplification product was digested with SphI/HpaI restriction  
844 enzymes and fragments resolved in 2% agarose gels. Fragment length  
845 polymorphism defined lineages TcI for SylvioX10, K98, 733MM and 173BB; TcII  
846 for Y; TcV/VI for CL Brener, RA, 401BB and 748BB. (B) The digestion of TcMK  
847 product with XhoI allows to distinguish between DTUs TcV (401BB and 748BB)  
848 and TcVI (CL Brener and RA).

849

850 **S2 Fig. The 3D culture model.**

851 (A) Monolayer of HeLa cells stably expressing LifeAct-RFP (HeLaR2), generated  
852 by lentiviral infection of the parental HeLa cells. (B) Spheroids formation by liquid  
853 overlay. After 24 h, spheroids are irregular aggregates of cells. From 72 h after  
854 culturing, spheroids seem to be compact aggregate of cells with well delimited  
855 borders.

856

857 **S3 Fig. Infection of 2D-monolayer and spheroids at m.o.i. 1, with strains CL**  
858 **Brener and Sylvio.**

859 HeLaR2 cells were incubated with CFSE-labelled trypomastigotes for 24 h and  
860 then monolayers or spheroid cultures fixed. (A) the Infected cells were  
861 determined by flow cytometry, which detects both attached and internalized  
862 parasites. (B) Quantification of 3 independent experiments, carried out as  
863 described for A. (C, D) Spheroids were disaggregated and released parasites  
864 (free parasites inside spheroids) were visualized by fluorescence microscopy  
865 and quantified. \* *t test* <0.05.

866

867 **S4 Fig. Dissemination pattern within spheroids of CL Brener after 1 h of**  
868 **infection.**

869 Spheroids incubated with 10 m.o.i. of CFSE-CL Brener parasites for 1h were  
870 fixed and confocal planes were obtained at 10, 30 and 50  $\mu\text{m}$  in depth -on the z  
871 axis- with 40x objective. Representative images of the invasiveness of CL  
872 Brener parasites -green fluorescence- that were detected even at 50  $\mu\text{m}$  in depth  
873 within the spheroids. Scale bar = 100  $\mu\text{m}$ .

874

875 **S5 Fig. Invasiveness within spheroid is not mediated by soluble factors.**

876 (A) spheroids were incubated with CFSE-CL Brener (left) or CFSE-SylvioX10  
877 (right) trypomastigotes for 24 h along with control media, or conditioned media  
878 (CM) from either SylvioX10 or CL Brener trypomastigotes. Then, spheroids were  
879 fixed and confocal images were taken at 10, 30 and 50  $\mu\text{m}$  in depth from  
880 spheroid surface. (B) Spheroids incubated with CL Brener or SylvioX10  
881 trypomastigotes in presence of control media or conditioned media were  
882 disaggregated with trypsin and % of infected cells was measured by flow  
883 cytometry.

884

885 **S6 Fig. The free motility *in vitro* is not associated with invasion inside**

886 **spheroids.** Trypomastigotes were pelleted in round bottom tubes and then  
887 incubated for 2 h at 37°C in medium to allow free-swimming (Left image).  
888 Aliquots of 1 ml (layer 1 to 5) of the medium from top to bottom were carefully  
889 collected and quantification of the % of parasites in each layer and pellet was  
890 carried out by microscopy, on Neubauer chamber (graph). Isolates / strains are  
891 classified in two groups: those that presented low motility [ $>40$  % of  
892 trypomastigotes in the pellet after 2 h] and those with high motility [ $<20\%$  of  
893 parasites in the pellet] and trypomastigotes were homogeneously distributed  
894 among all layers]. As a reference, the low migran strains (into spheroids) are in  
895 pink and the high migrants are in sky blue. pasa a suplementaria

896

897 **S1 and S2 movies.**

898 HeLaR2 spheroid infected with CFSE-SylvioX10 (video1) or CFSE-CL Brener

899 (video 2); 3D reconstruction. Z-stack images were obtained by confocal  
900 microscopy using 10x objective. The videos were realized by using ImageJ  
901 software -3D viewer plugin-. Half of an infected spheroid rotating on the Y axis is  
902 shown. Green: CFSE-parasites. Red: LifeAct-RFP of HeLa cells.

903

904 **S3 movie.**

905 3D reconstruction of a single HeLaR2 cell on the surface of a SylvioX10-infected  
906 spheroid. Z-stack images were obtained by confocal microscopy using 60x  
907 objective. The video was realized by using ImageJ software -3D viewer plugin-.  
908 Multiple amastigotes within a single cell are shown. Green: CFSE-parasites.  
909 Red: LifeAct-RFP of HeLa cells.

910

911 **S4 movie.**

912 3D reconstruction of a single CL Brener trypomastigote located inside the  
913 spheroid ( $\approx 30 \mu\text{m}$  deep) after 1 h of incubation. Z-stack images were obtained  
914 by confocal microscopy using 60x objective. The video was realized by using  
915 ImageJ software -3D viewer plugin-. The paracellular location of the  
916 trypomastigote is shown. Green: CFSE-parasites. Red: LifeAct-RFP of HeLa  
917 cells.

918

919 **S5 movie.**

920 The video shows the scanning of the first 20-30  $\mu\text{m}$  (from the surface to the

921 center) of a CL Brener-infected spheroid after 1 h of incubation. Z-stack images  
922 were obtained by confocal microscopy using 60x objective. The video was  
923 realized by using ImageJ software. White arrow shows the paracellular located  
924 trypomastigote. Green: CFSE-trypomastigotes. Gray: HeLa cells.

925

#### 926 **S6 movie**

927 3D reconstruction of a single intracellular CL Brener trypomastigote located  
928 inside the spheroid (20-30  $\mu\text{m}$  deep) after 1 h of incubation. Z-stack images were  
929 obtained by confocal microscopy using 60x objective. The video was realized by  
930 using ImageJ software -3D viewer plugin-. Green: CFSE-trypomastigotes. Red:  
931 LifeAct-RFP of HeLa cells.

932

#### 933 **S7 and S8 movies**

934 3D reconstruction of a HeLaR2 spheroid infected with CFSE-Y trypomastigotes  
935 (video 7) or CFSE-RA trypomastigotes (video 8). Z-stack images were obtained  
936 by confocal microscopy using 10x objective. The video was realized by using  
937 ImageJ software -3D viewer plugin-. A half of an infected spheroids rotating on  
938 the Y axis shown. Green: CFSE-parasites. Red: LifeAct-RFP of HeLa cells.

939

940

941

942



943

944

945

946

947

948

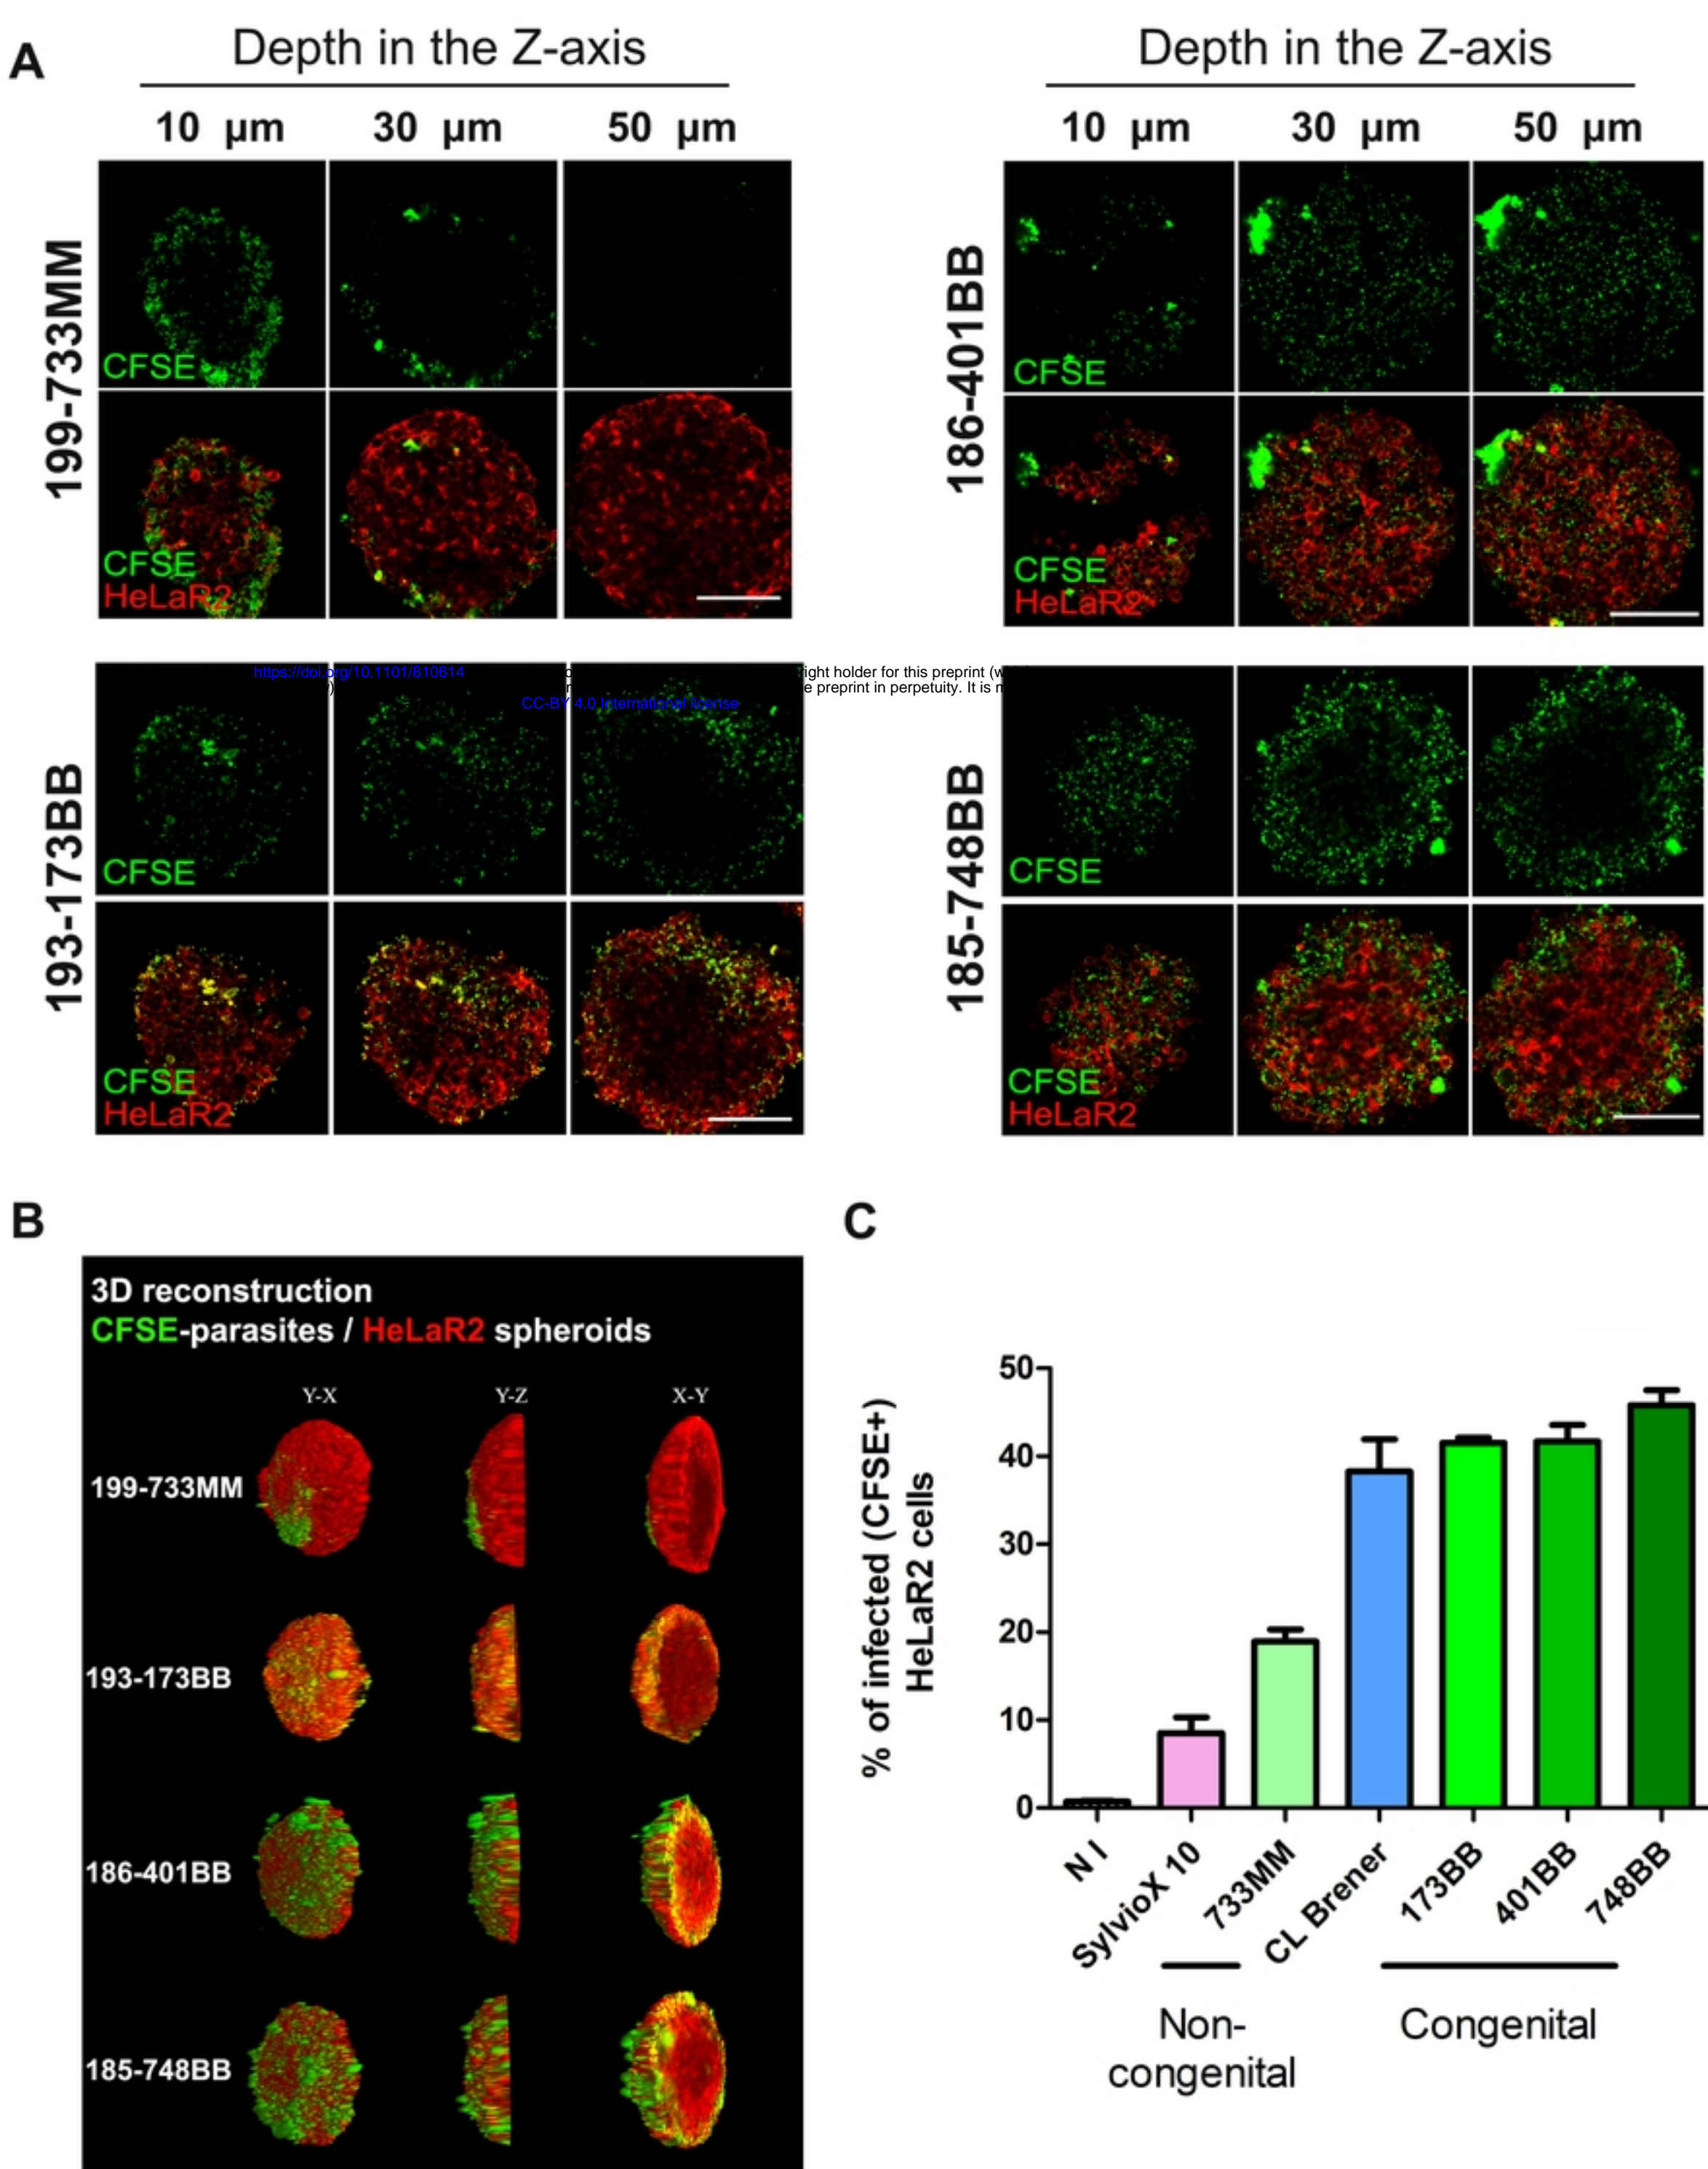

Fig 7



### Depth in the Z-axis

10  $\mu\text{m}$       30  $\mu\text{m}$       50  $\mu\text{m}$

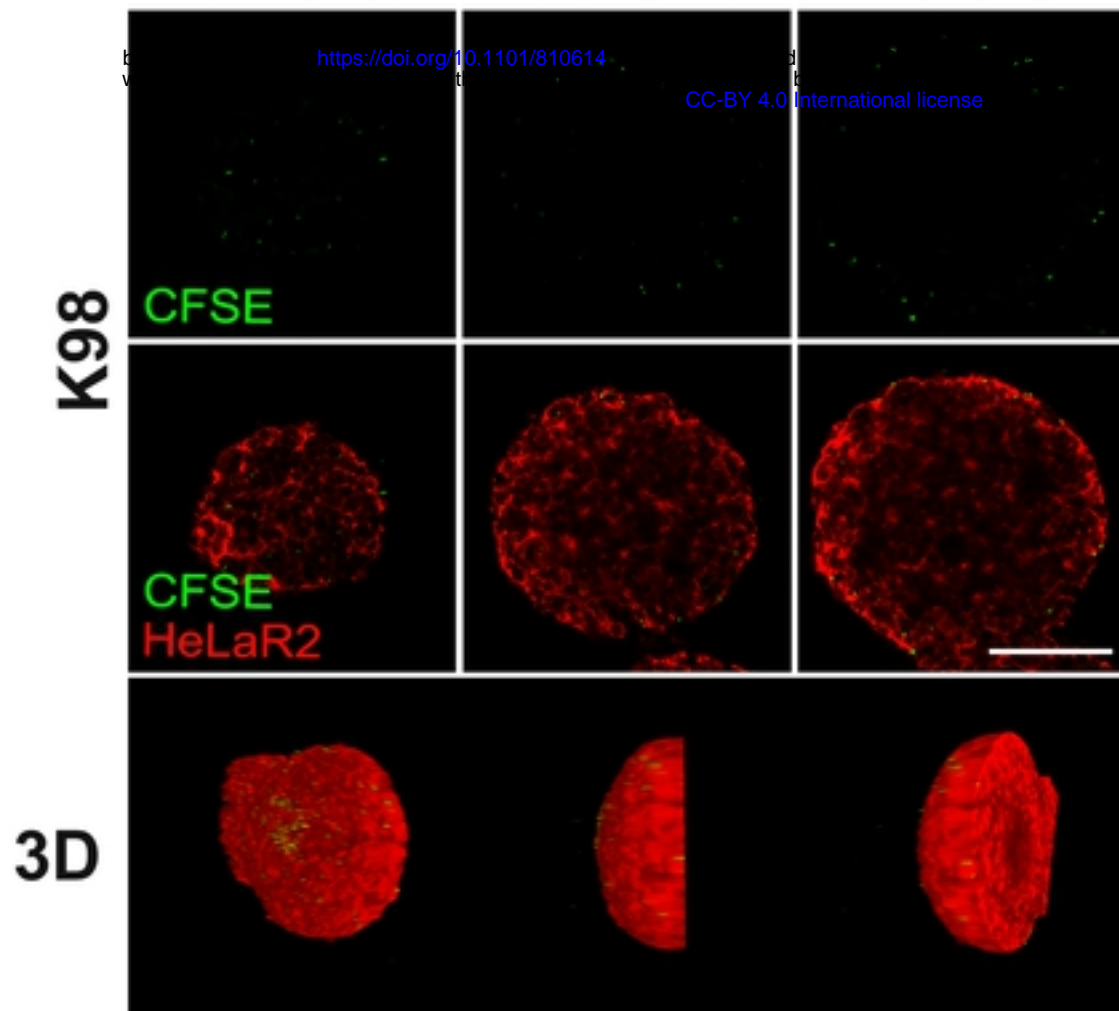

### Depth in the Z-axis

10  $\mu\text{m}$       30  $\mu\text{m}$       50  $\mu\text{m}$

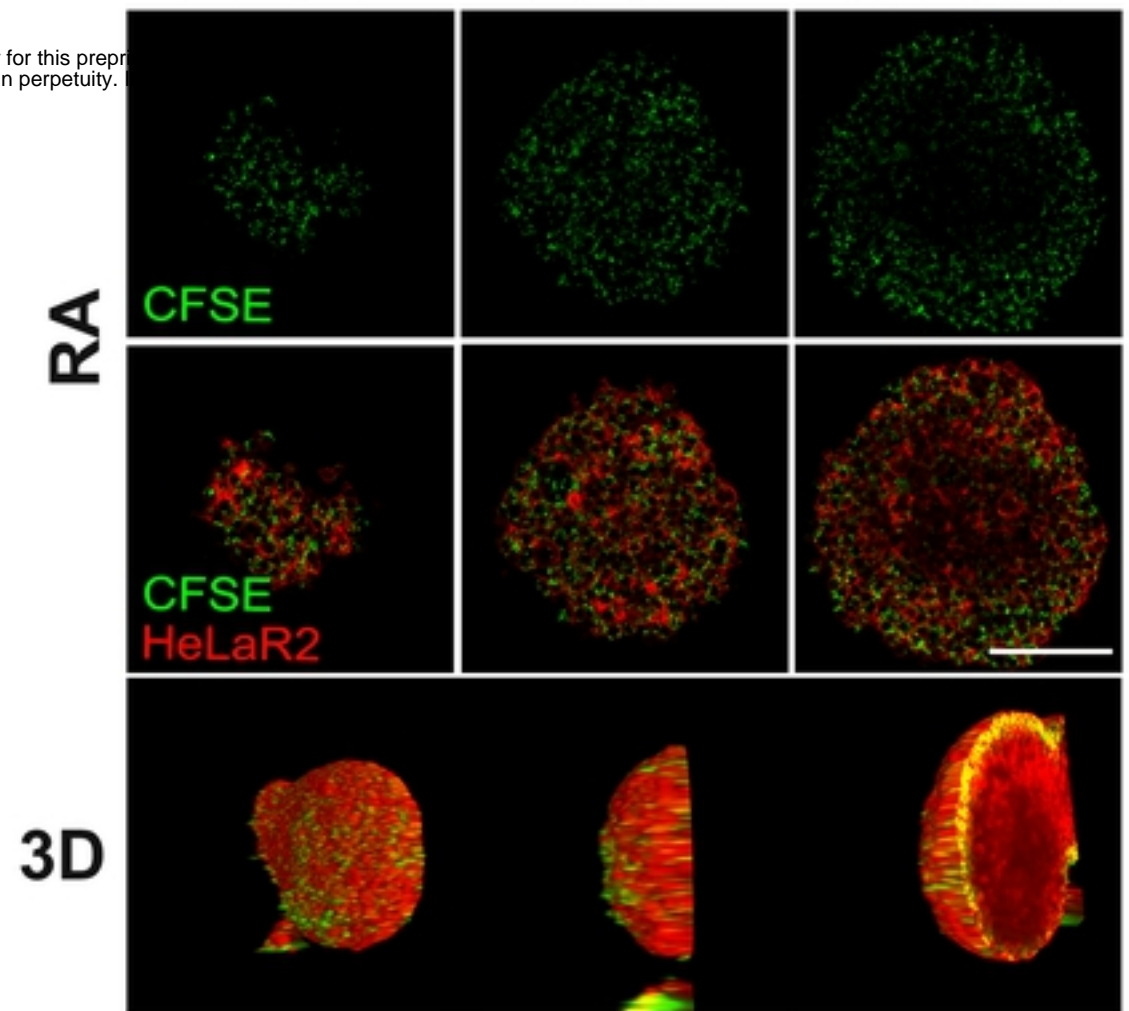

**Dm28c**

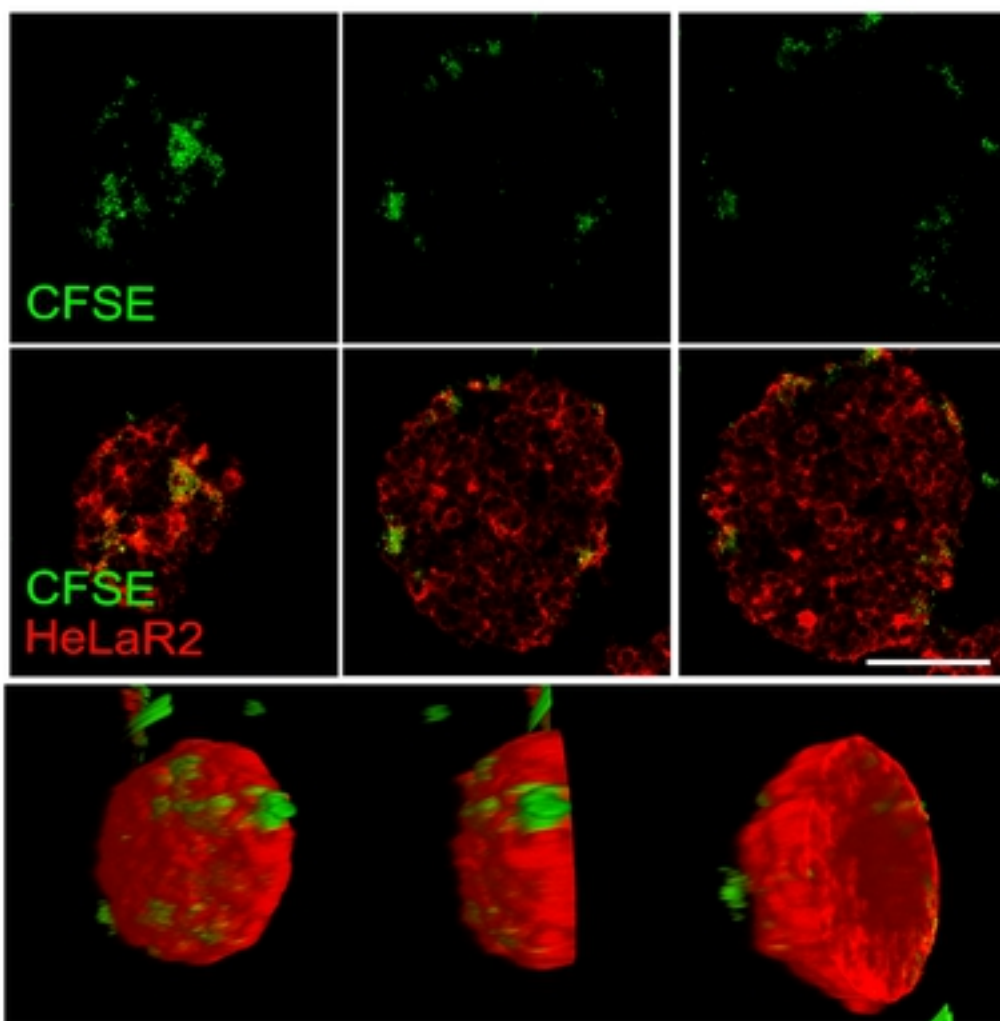

**Y**

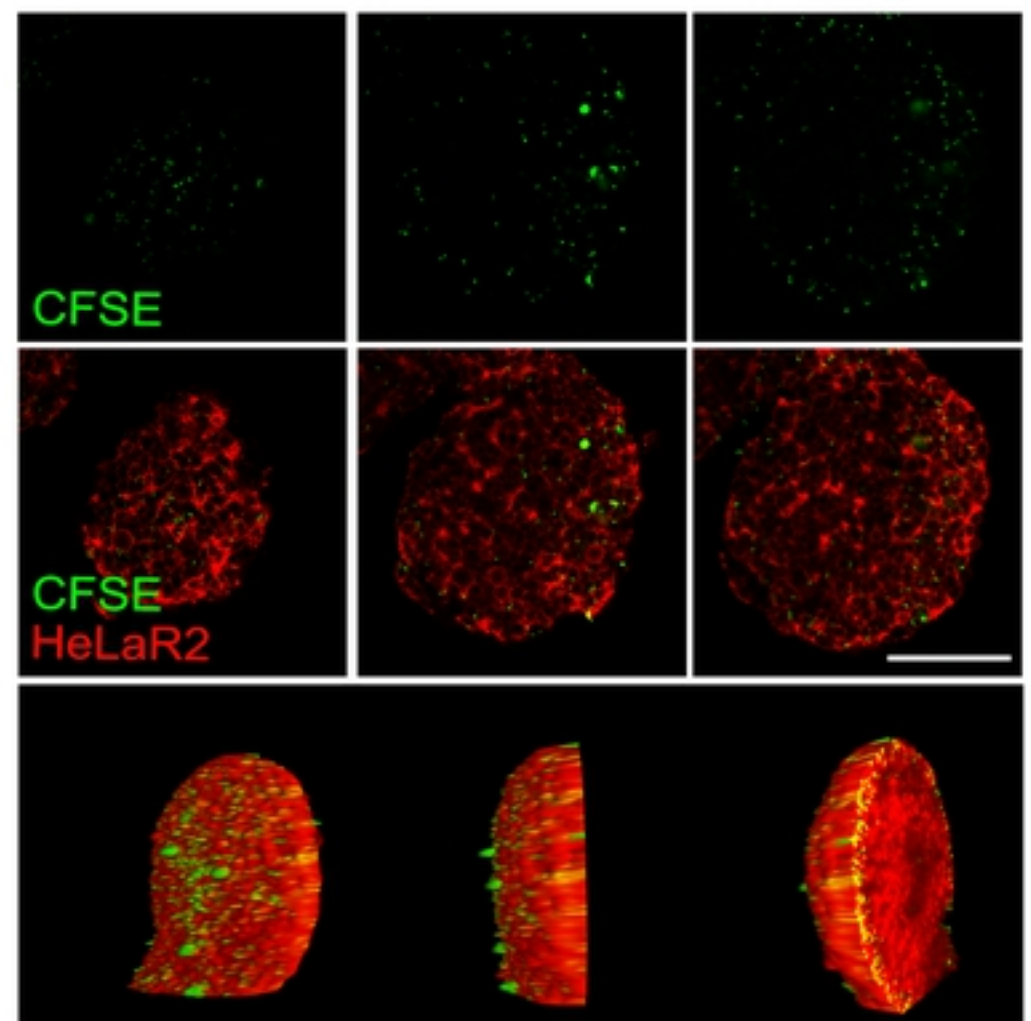

Fig 6

A

## Depth in the Z-axis

bioRxiv preprint doi: <https://doi.org/10.1101/810614>; this version posted October 21, 2019. The copyright holder for this preprint (which was not certified by peer review) is the author/funder, who has granted bioRxiv a license to display the preprint in perpetuity. It is made available under aCC-BY 4.0 International license.

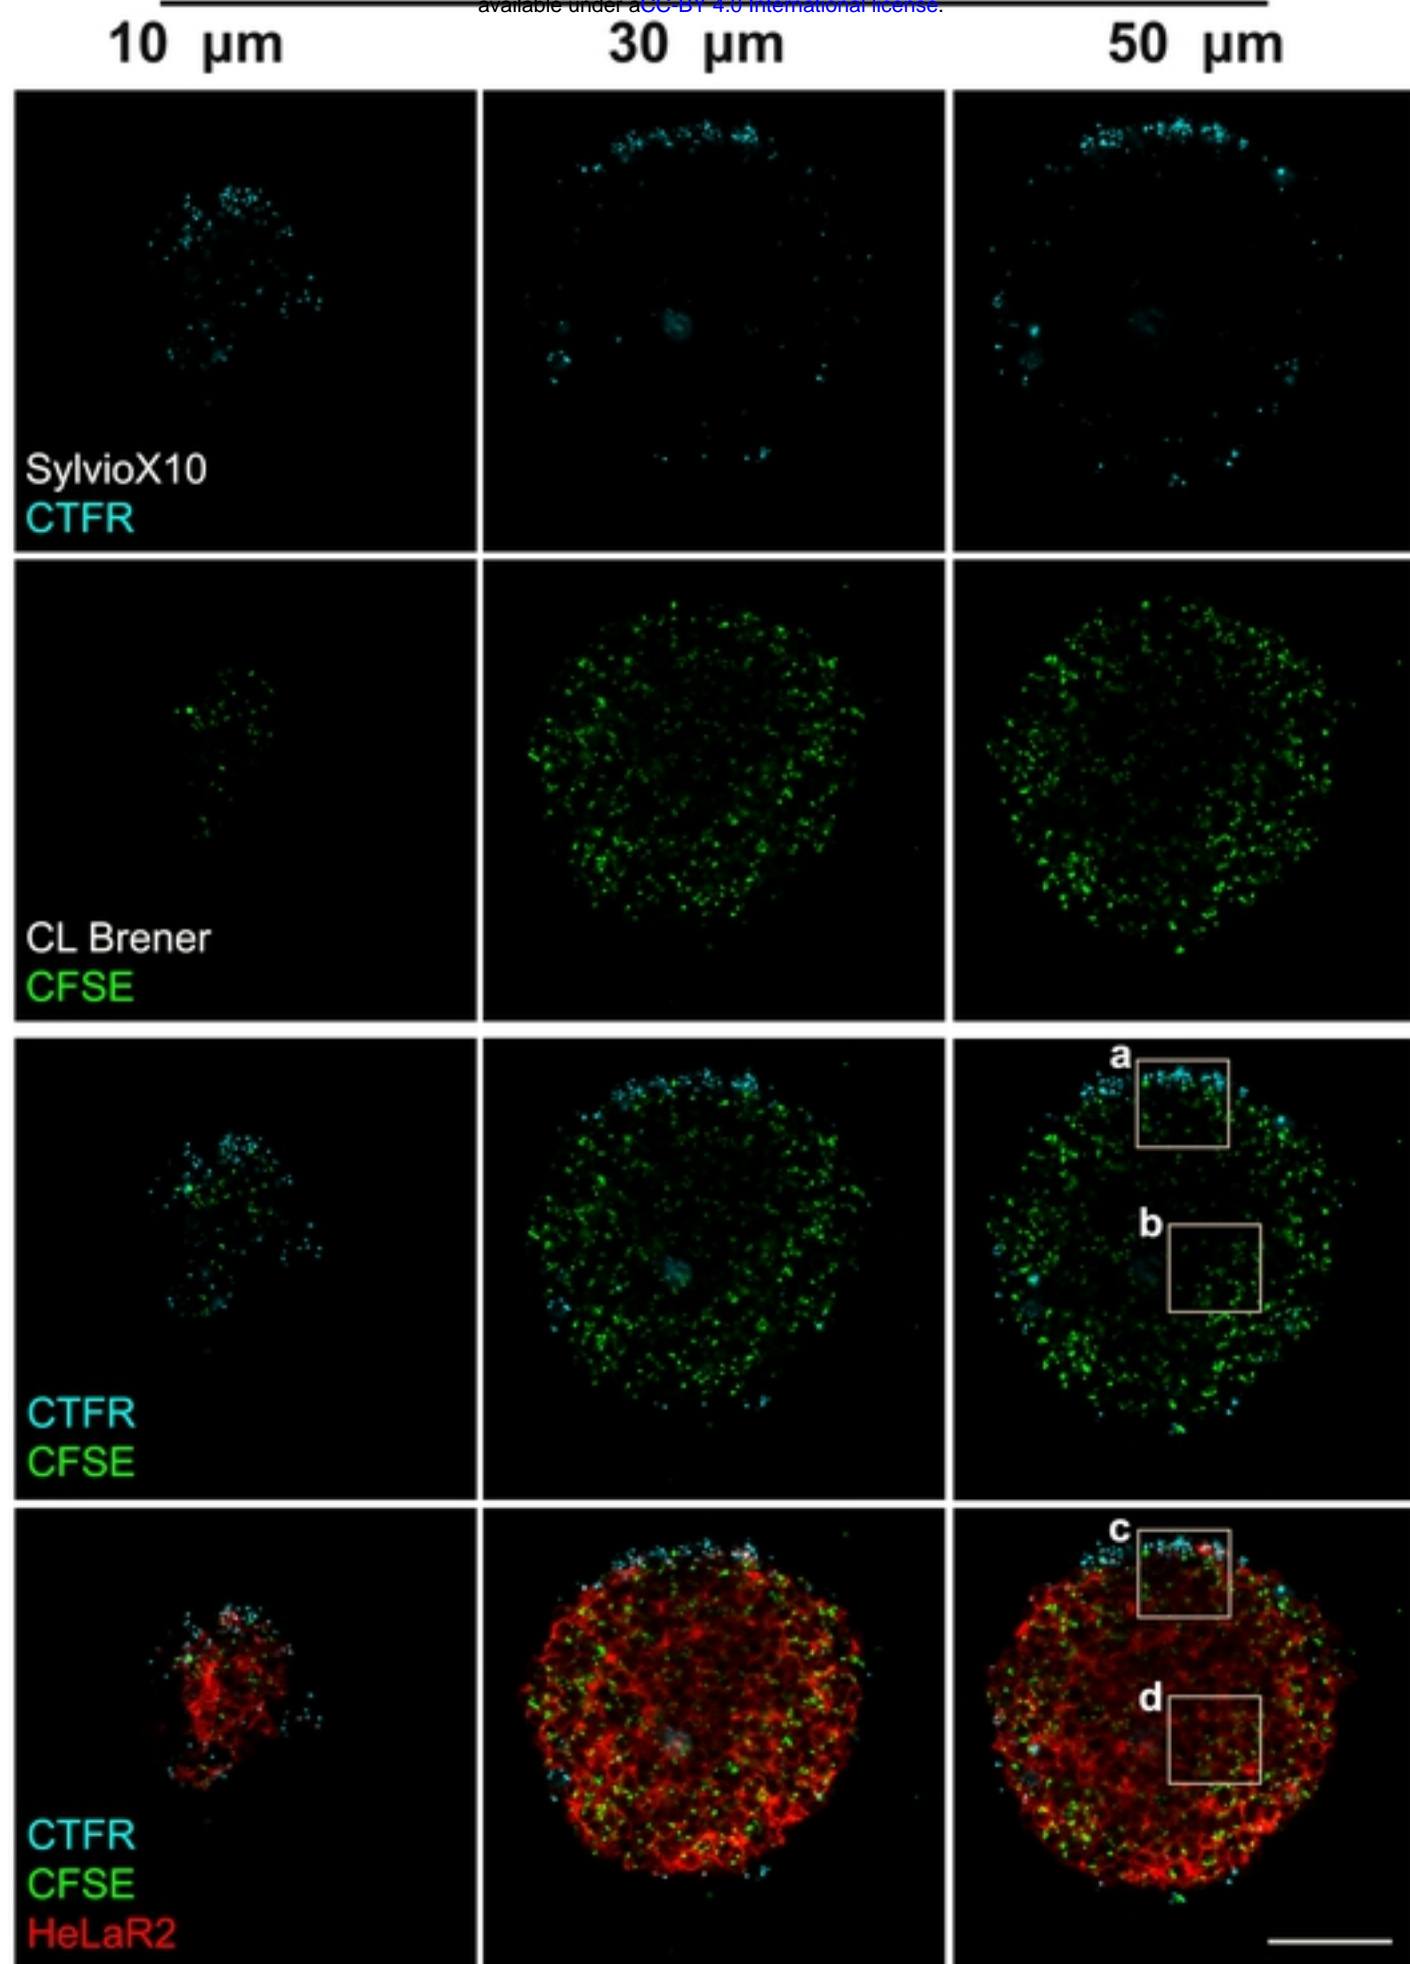

B

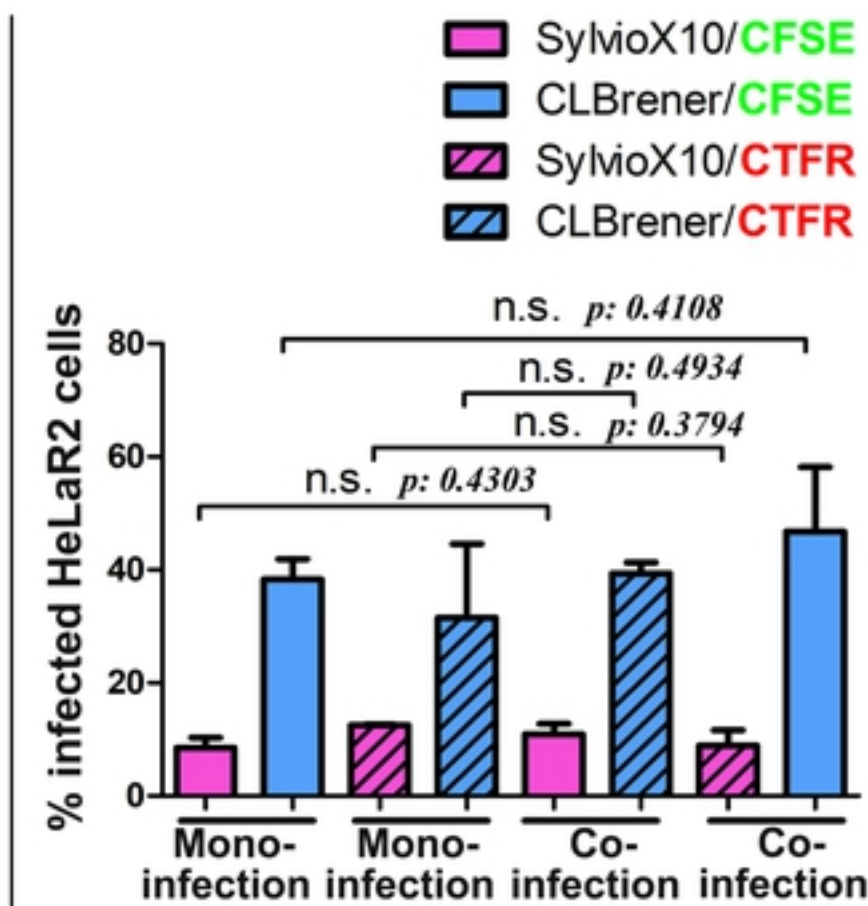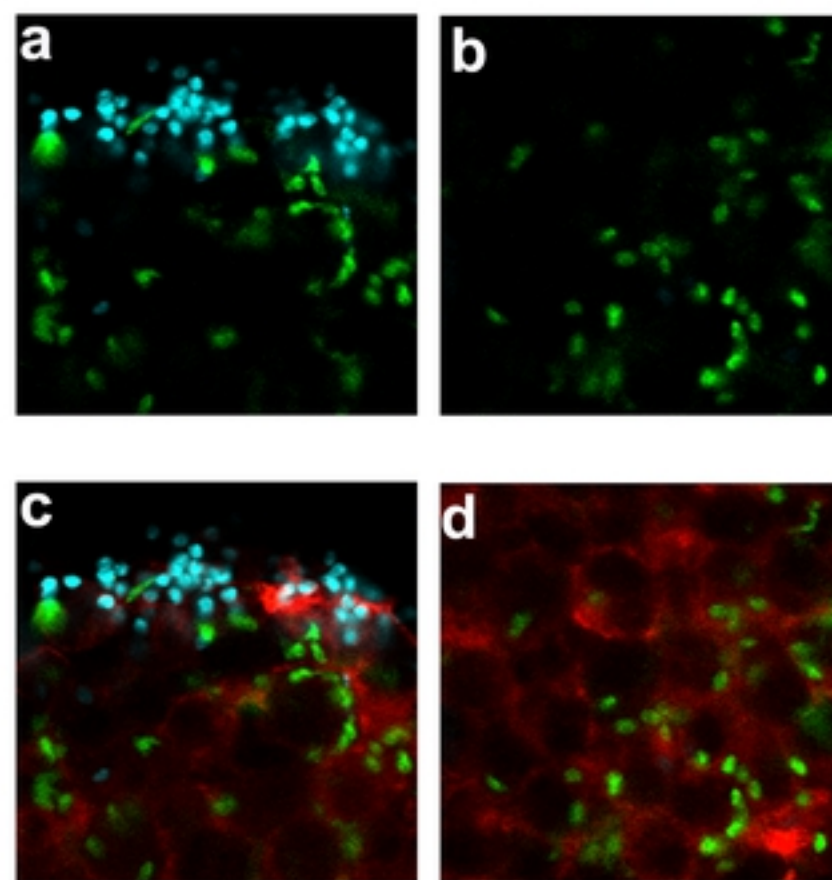

Fig 5



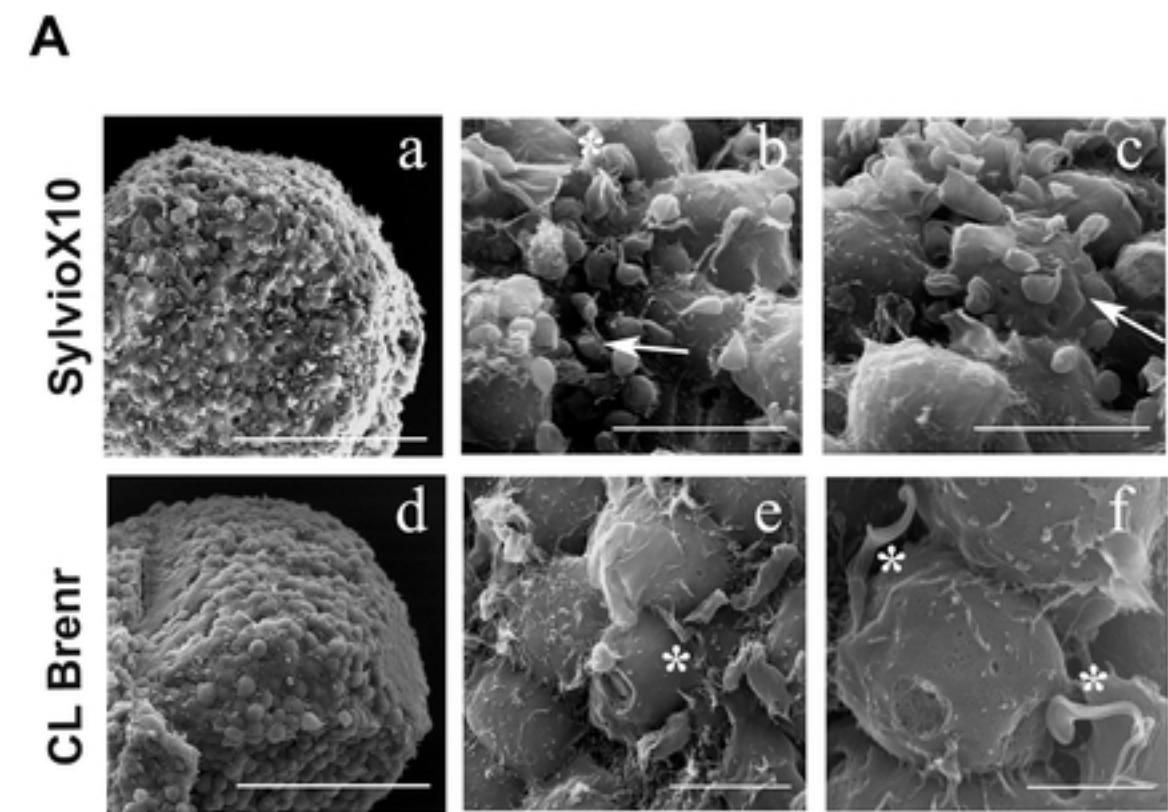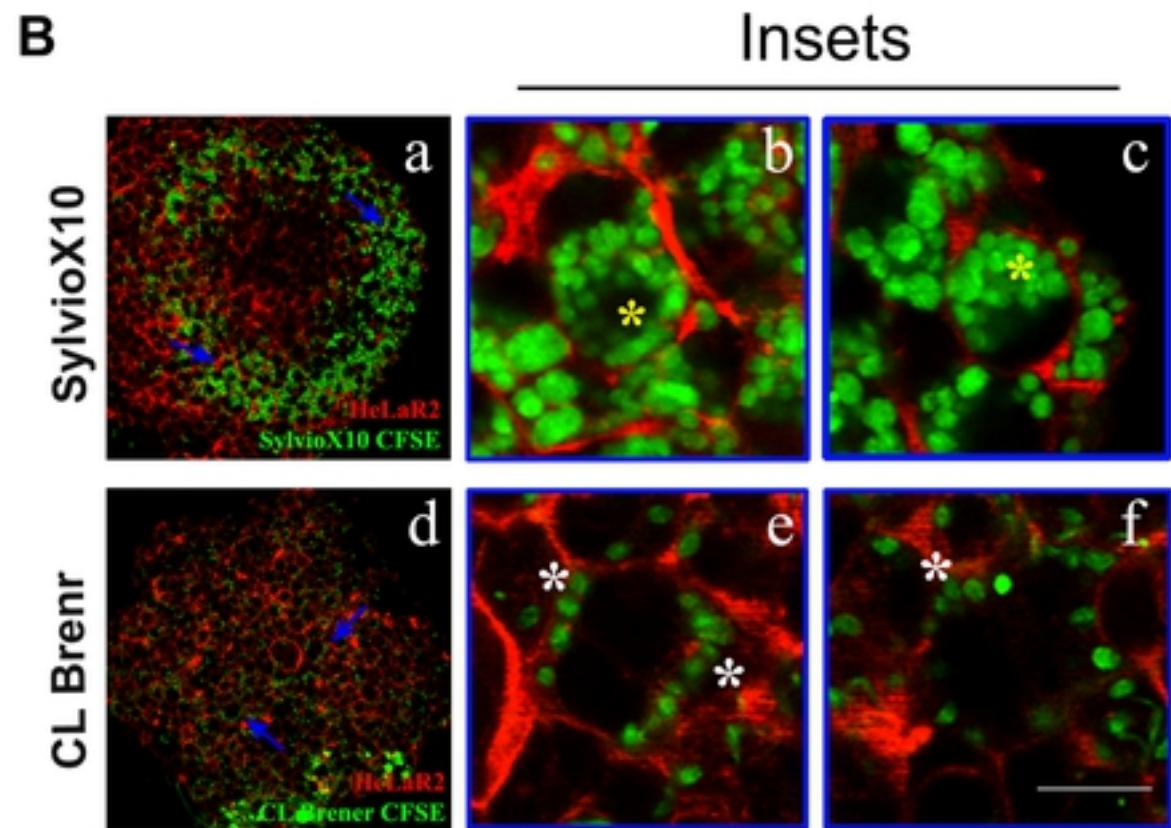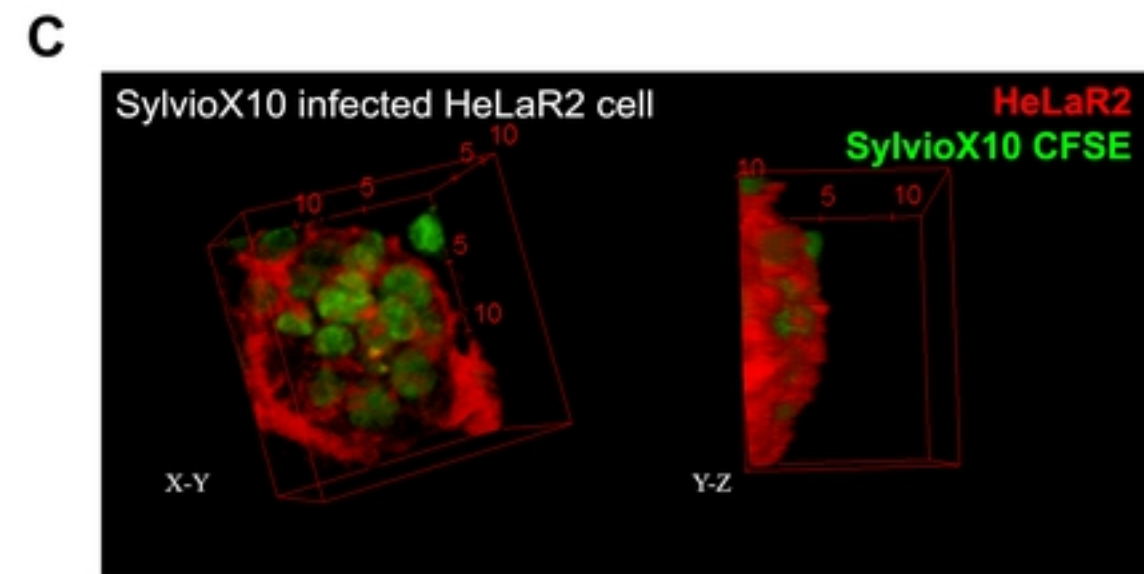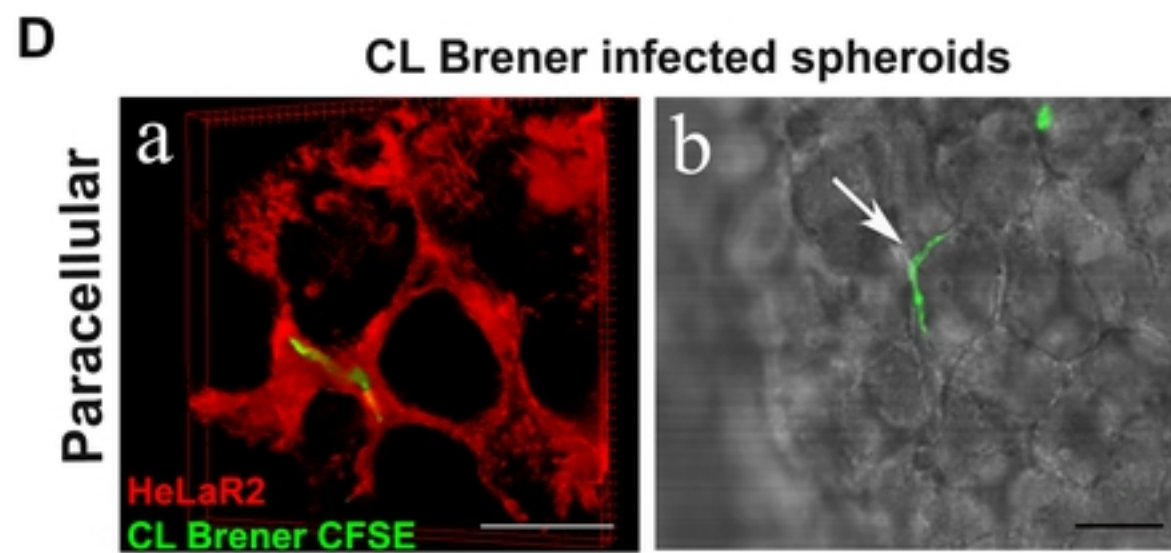

Fig 4

**A**

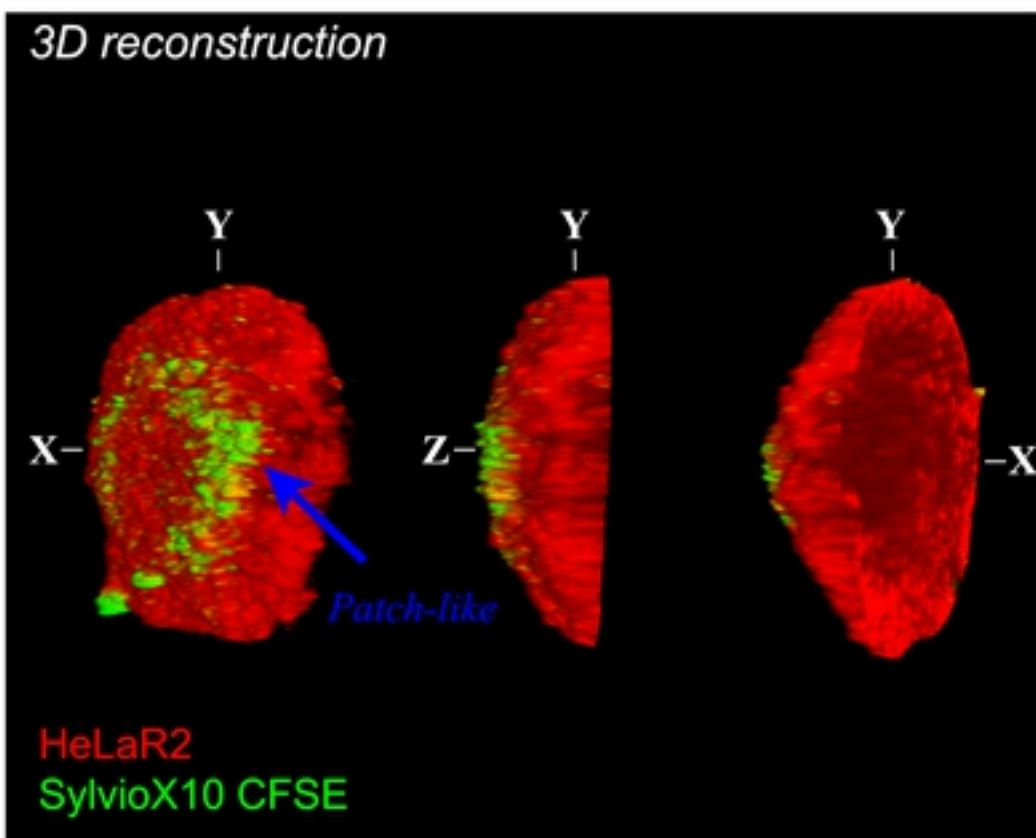

**C**

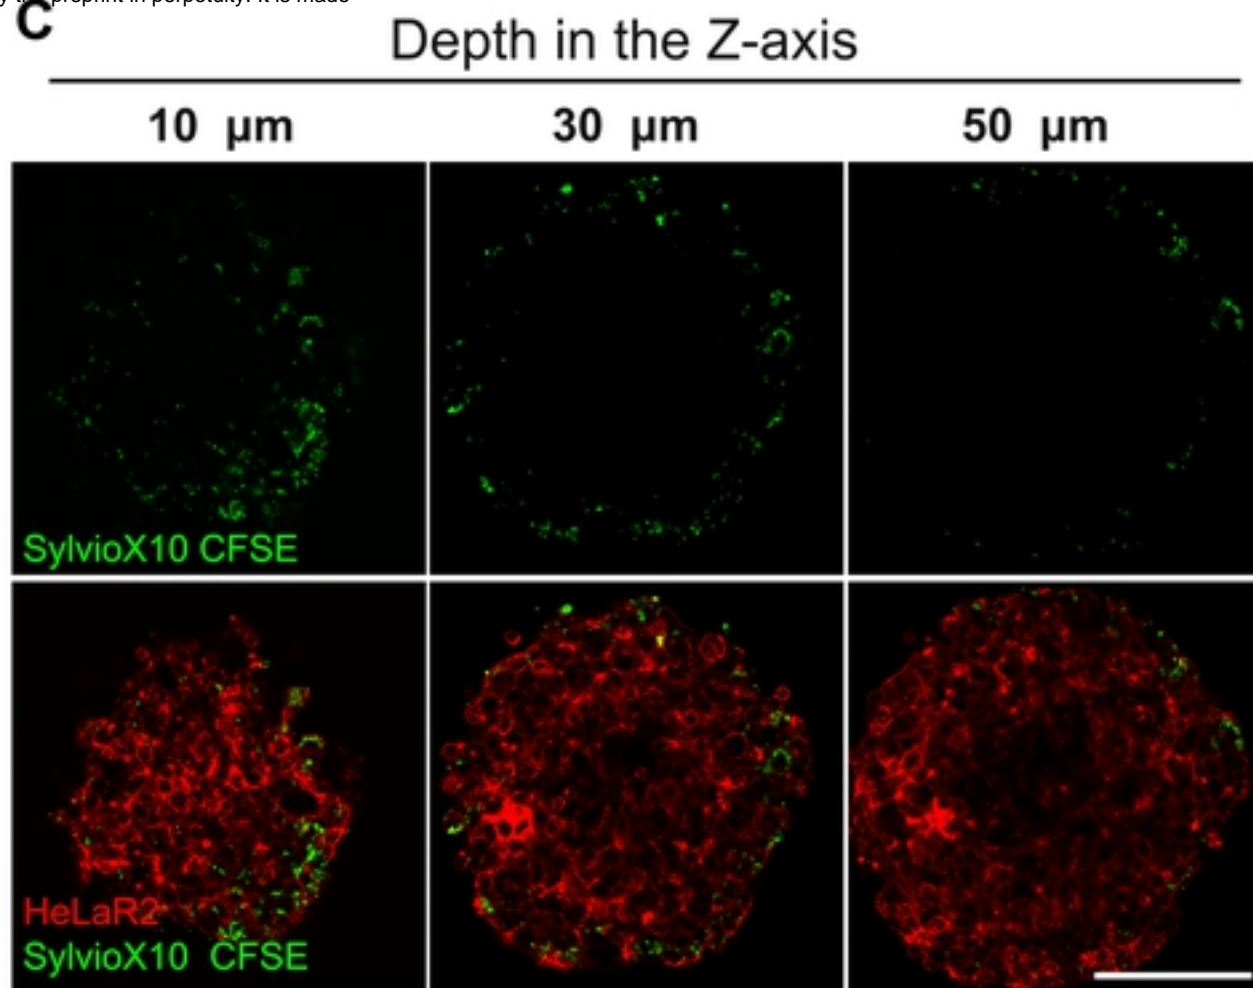

**B**

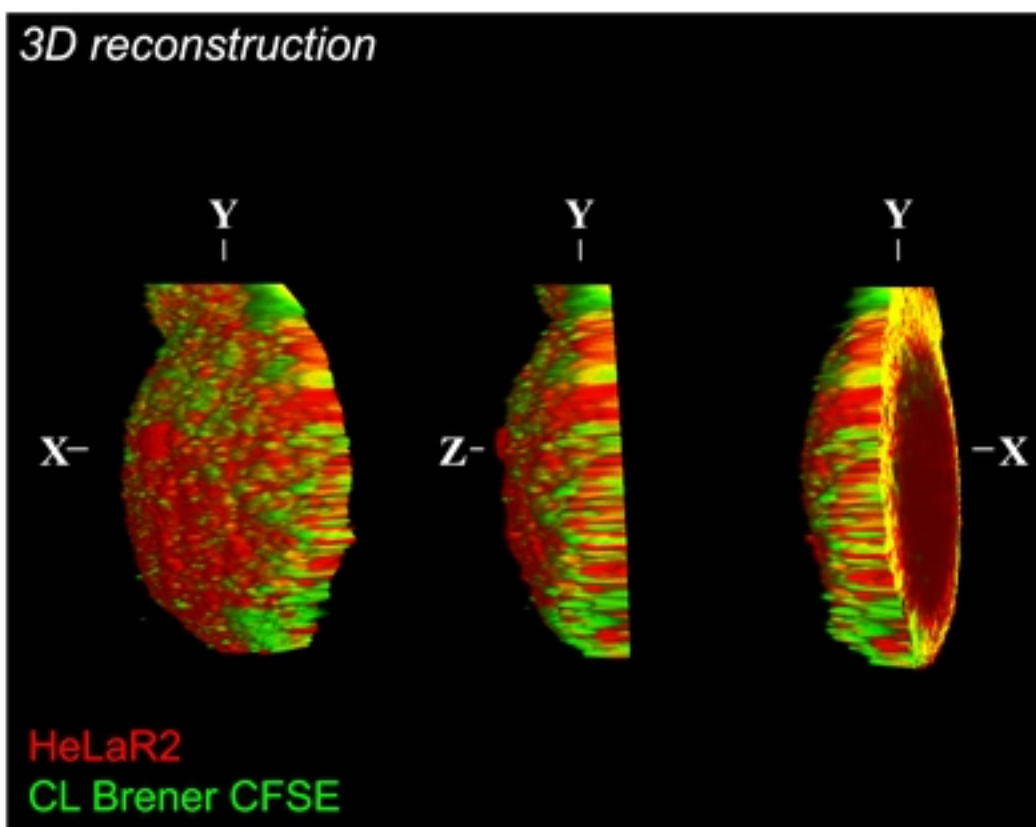

**D**

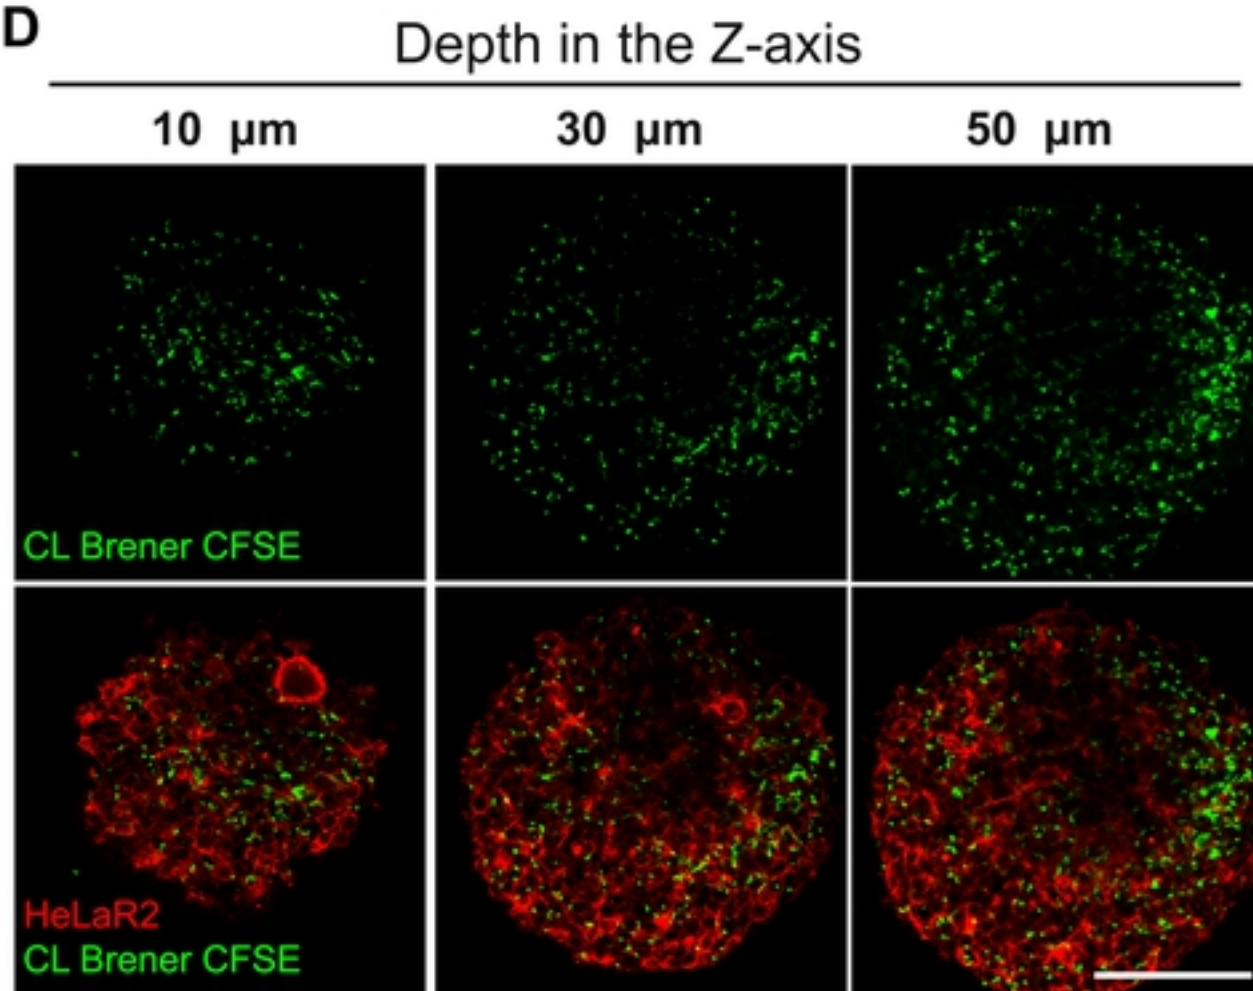

Fig 3



■ Non-infected ■ SylvioX10 ■ CL Brener

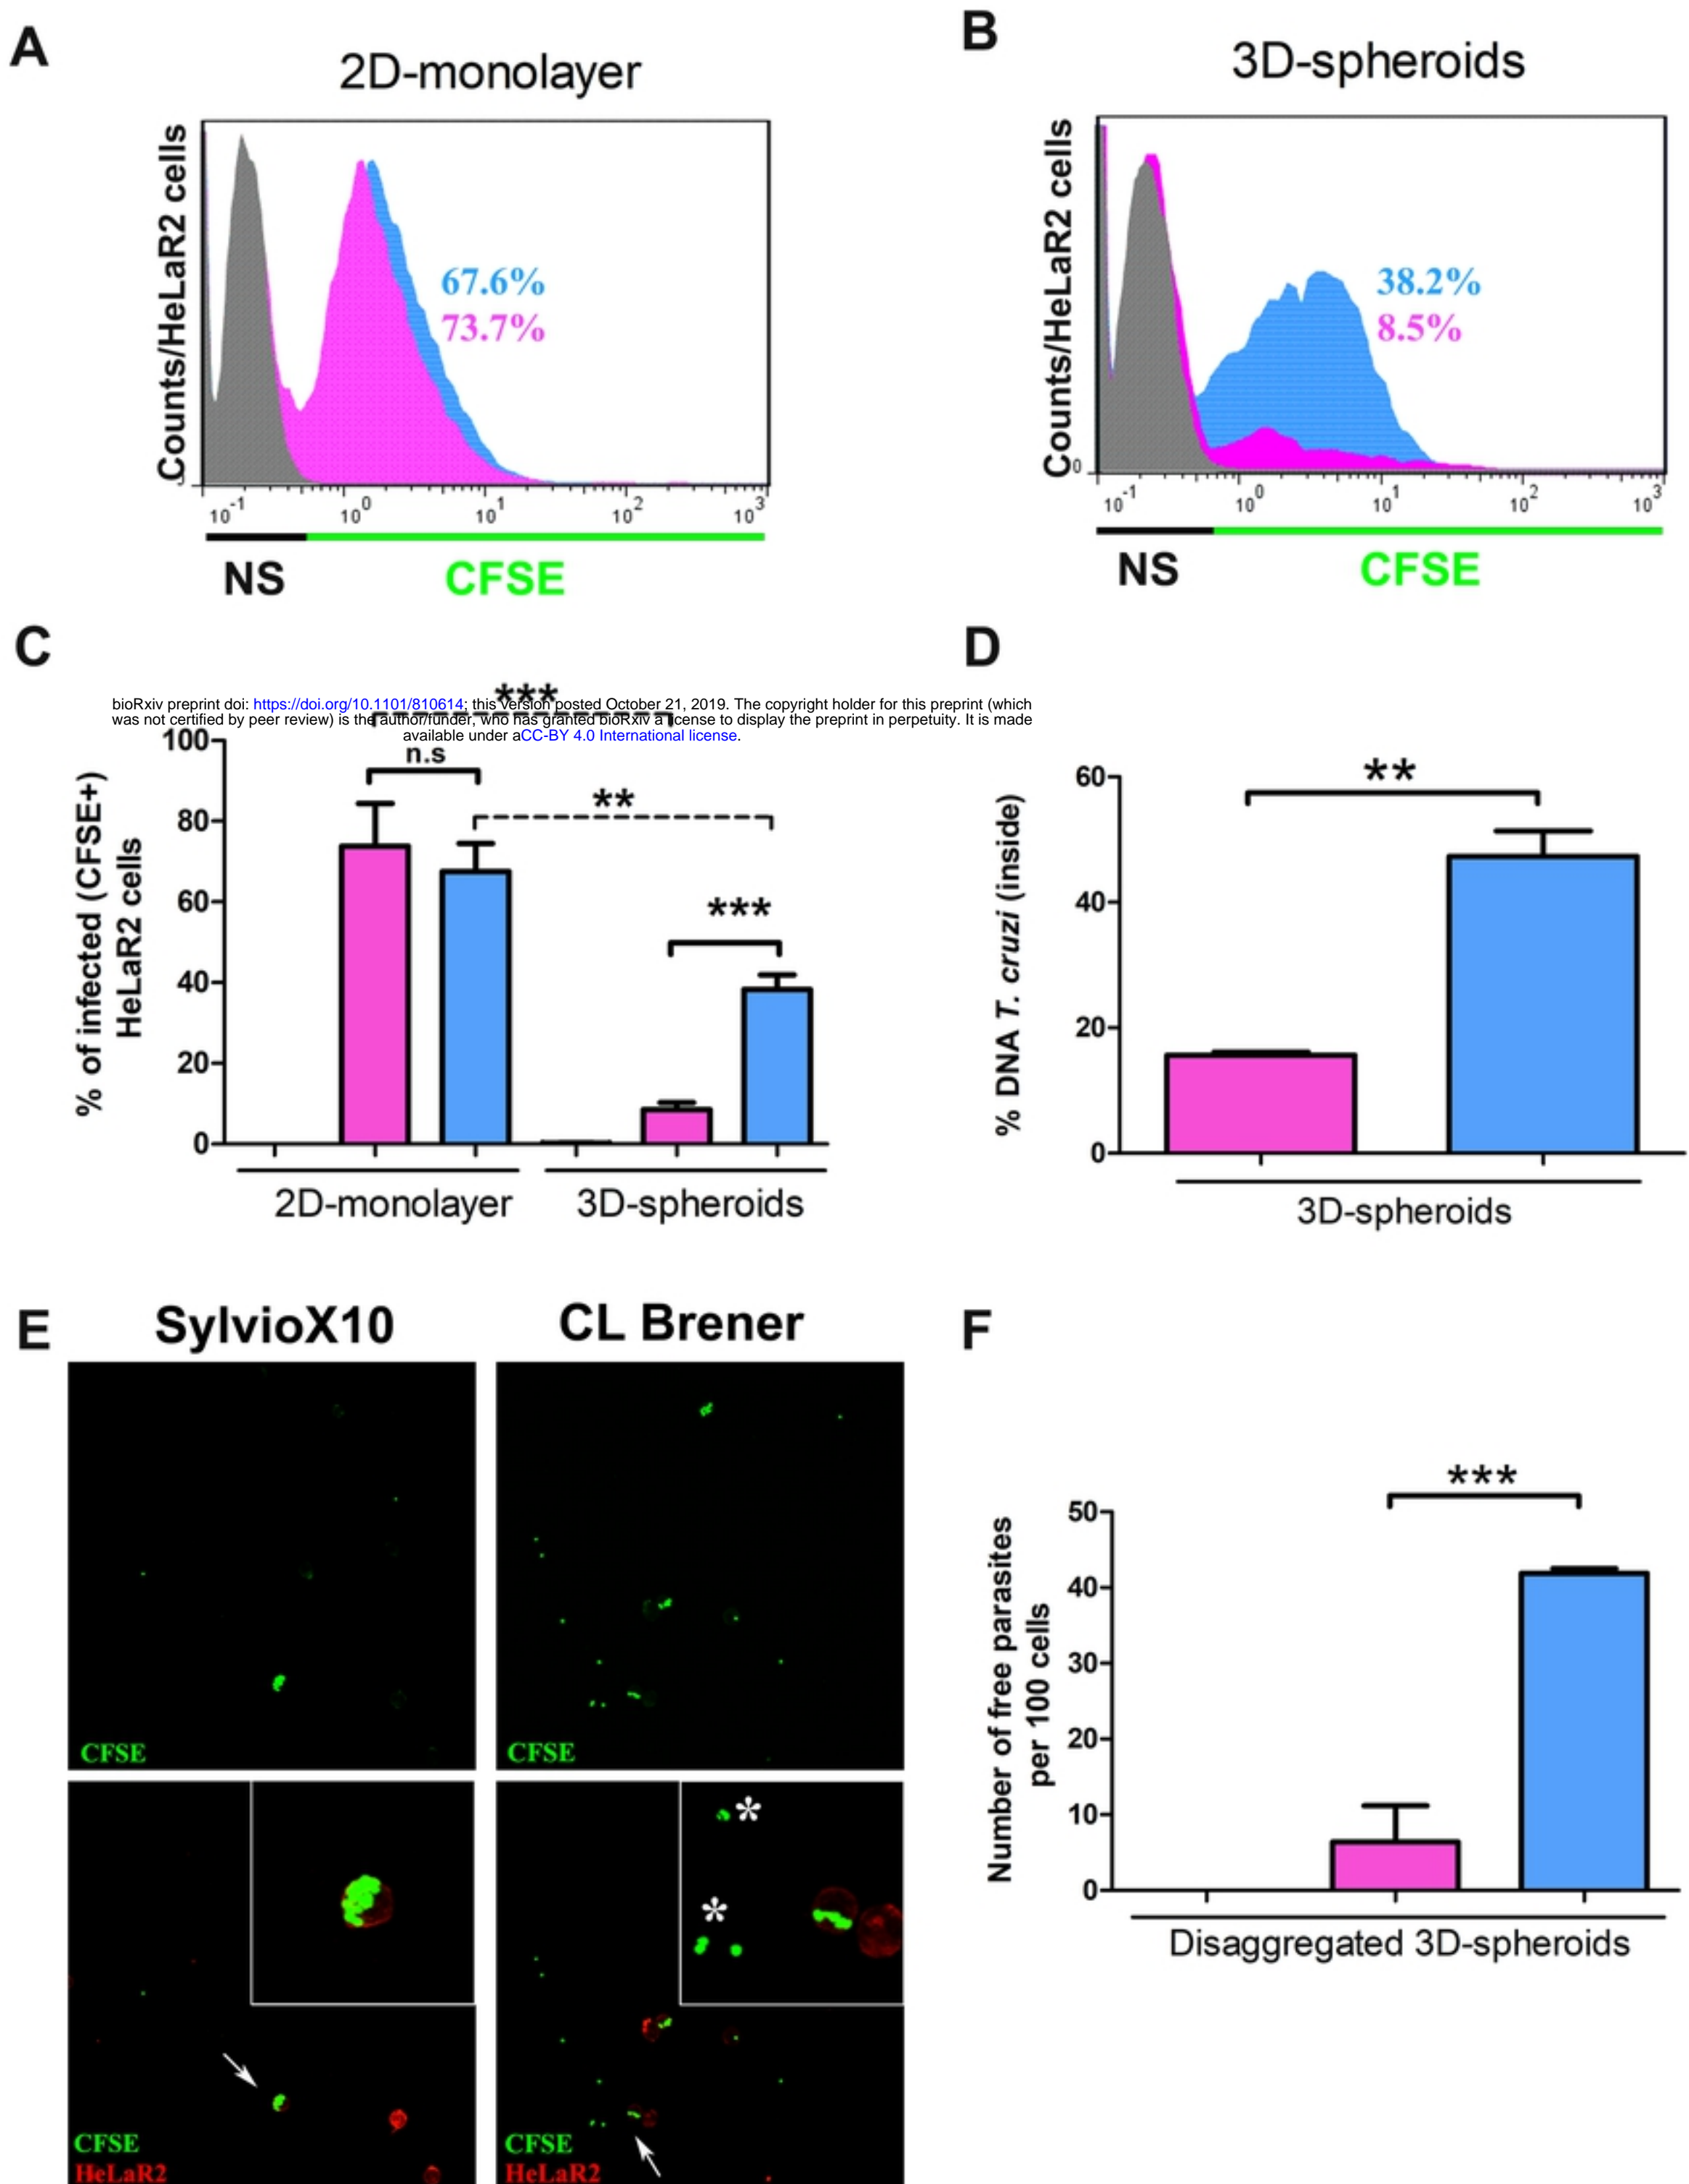

Fig 2

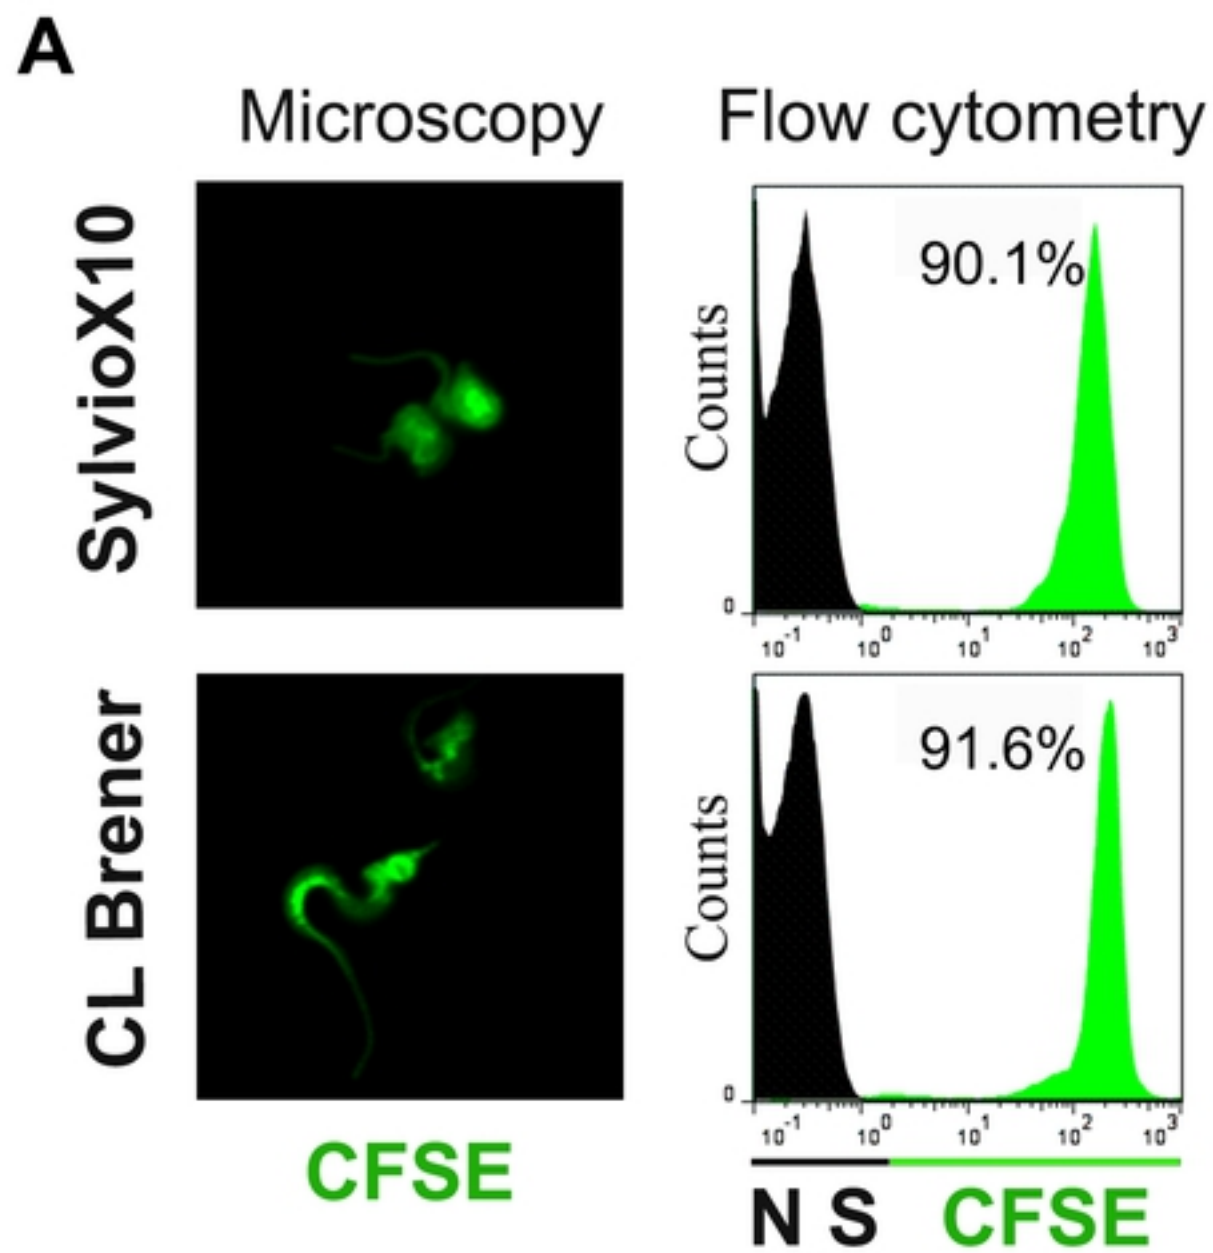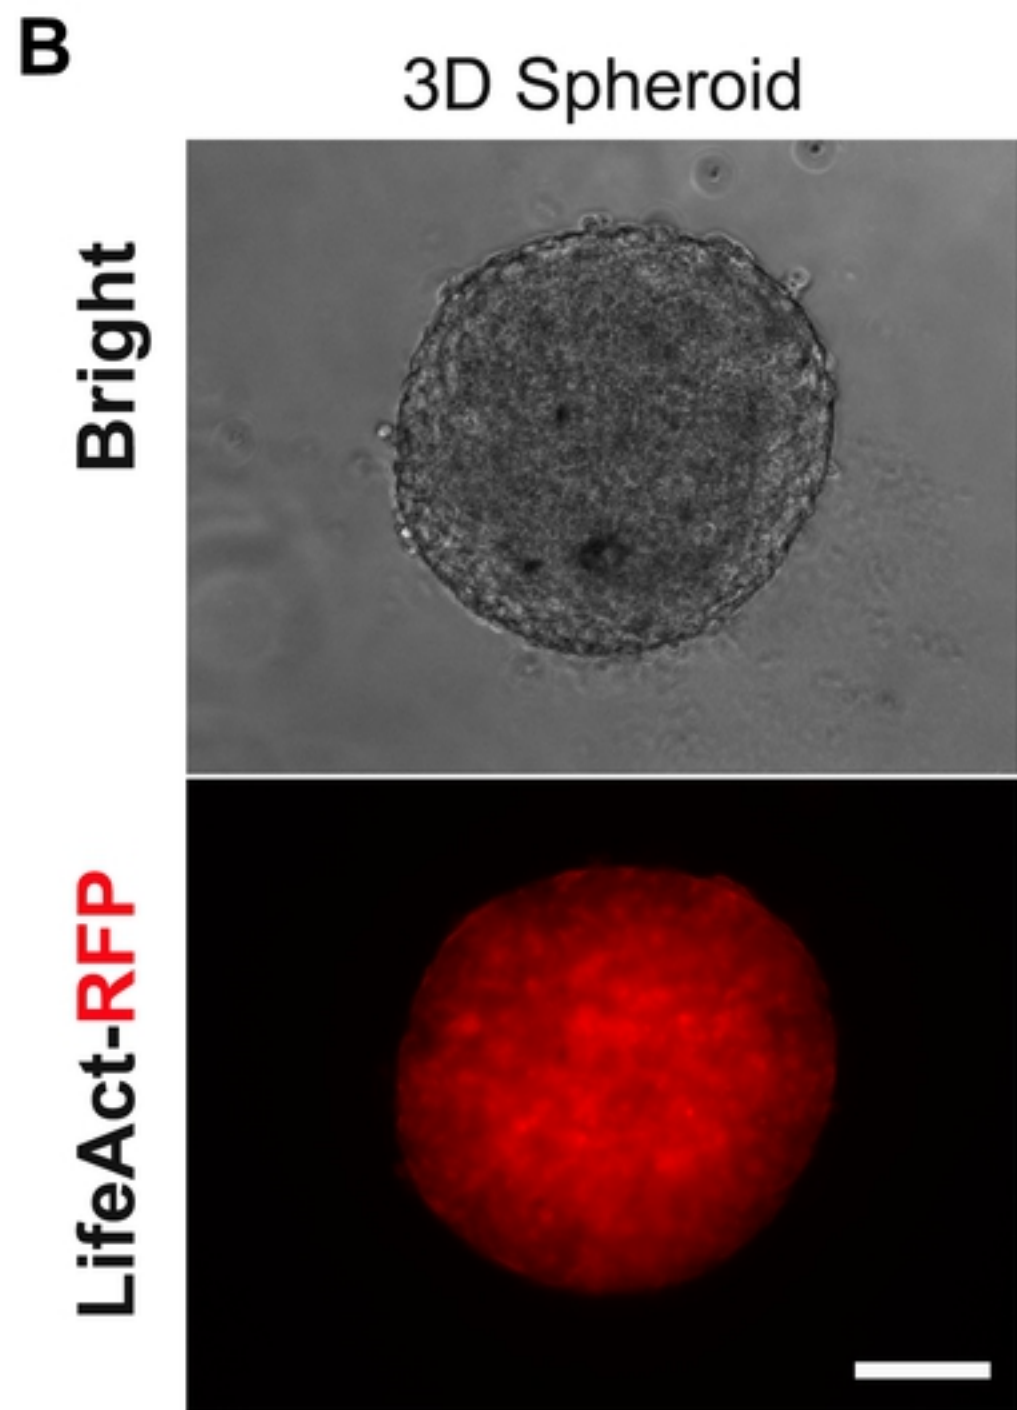

Fig 1
